1 [A detailed Molecular Network Map and Model of the NLRP3 Inflammasome](#)  
2 Marcus Krantz, Daniel Eklund, Eva Särndahl, and Alexander Hedbrant; on behalf of the X-HiDE  
3 consortium

4 School of Medical Sciences and Inflammatory Response and Infection Susceptibility Centre (iRiSC),  
5 Faculty of Medicine and Health, Örebro University, Örebro, Sweden

6 Correspondence to: [marcus.krantz@oru.se](mailto:marcus.krantz@oru.se)

7

## 8 [Abstract](#)

9 The NLRP3 inflammasome is a key regulator of inflammation that responds to a broad range of stimuli.  
10 The exact mechanism of activation has not been determined, but there is a consensus on cellular  
11 potassium efflux as a major common denominator. Once NLRP3 is activated, it forms high-order  
12 complexes together with NEK7 that trigger aggregation of ASC into specks. Typically, there is only one  
13 speck per cell, consistent with the proposal that specks form – or end up at – the centrosome. ASC  
14 polymerisation in turn triggers caspase-1 activation, leading to maturation and release of IL-1 $\beta$  and  
15 pyroptosis, i.e., highly inflammatory cell death. Several gain-of-function mutations in the NLRP3  
16 inflammasome have been suggested to induce spontaneous activation of NLRP3 and hence contribute  
17 to development and disease severity in numerous autoinflammatory and autoimmune diseases.  
18 Consequently, the NLRP3 inflammasome is of significant clinical interest, and recent attention has  
19 drastically improved our insight in the range of involved triggers and mechanisms of signal  
20 transduction. However, despite recent progress in knowledge, a clear and comprehensive overview of  
21 how these mechanisms interplay to shape the system level function is missing from the literature.  
22 Here, we provide such an overview as a resource to researchers working in or entering the field, as  
23 well as a computational model that allows for evaluating and explaining the function of the NLRP3  
24 inflammasome system from the current molecular knowledge. We present a detailed reconstruction  
25 of the molecular network surrounding the NLRP3 inflammasome, which account for each specific  
26 reaction and the known regulatory constraints on each event as well as the mechanisms of drug action  
27 and impact of genetics when known. Furthermore, an executable model from this network  
28 reconstruction is generated with the aim to be used to explain NLRP3 activation from priming and  
29 activation to the maturation and release of IL-1 $\beta$  and IL-18. Finally, we test this detailed mechanistic  
30 model against data on the effect of different modes of inhibition of NLRP3 assembly. While the exact  
31 mechanisms of NLRP3 activation remains elusive, the literature indicates that the different stimuli  
32 converge on a single activation mechanism that is additionally controlled by distinct (positive or  
33 negative) priming and licensing events through covalent modifications of the NLRP3 molecule. Taken  
34 together, we present a compilation of the literature knowledge on the molecular mechanisms on  
35 NLRP3 activation, a detailed mechanistic model of NLRP3 activation, and explore the convergence of  
36 diverse NLRP3 activation stimuli into a single input mechanism.

## 37 Introduction

38 The innate immune system serves as an immediate and essential defence towards exogenous and  
39 endogenous threats. Its activity is influenced by a number of pattern-recognition receptors (PRRs) that  
40 recognize pathogen- and damage-associated molecular patterns (PAMPs/DAMPs). The PAMPs are  
41 families of highly conserved molecular patterns that are indicative of (evolutionarily) common  
42 pathogens, while the DAMPs are endogenous compounds that are released from cells or the  
43 extracellular matrix during tissue or cell damage, or exogenous molecules, such as air pollution  
44 particles. PAMP and DAMPs can be recognised at the plasma membrane, in the endolysosomal system,  
45 or in the cytoplasm. Inflammasomes belong to the latter group, by being centred around intracellular  
46 receptors that can nucleate the formation of a large intracellular protein complex [1]. When activated,  
47 these receptors trigger inflammasome assembly and thereby caspase-1 activation, proteolytic  
48 processing and release of cytokines, such as interleukin (IL)-1 $\beta$  and IL-18, and eventually pyroptosis –  
49 a highly pro-inflammatory form of cell death – via gasdermin D-dependent pore formation.  
50 Inflammasome activation has also been linked to direct anti-microbial actions through autophagy,  
51 presumably to clear the infection [2], and the direct bactericidal effect of mature and active gasdermin  
52 D [3]. Hence, inflammasomes are critical immune regulators at the intersection between immediate  
53 antimicrobial defence and intercellular signalling.

54 The NLRP3 inflammasome is the odd one out of the inflammasome sensors, as it responds to a large  
55 repertoire of signals. Instead of recognising a conserved molecular pattern, NLRP3 responds to a wide  
56 range of triggers that at a first glance have little in common. These include perturbation to the  
57 membrane potential with ionophoric toxins, such as nigericin, perturbation to mitochondrial function,  
58 and exposure to crystals and crystal forming compounds. In response to each of these triggers, NLRP3  
59 oligomers serve as a nucleation centre for ASC polymerisation. ASC is recruited to NLRP3 through  
60 homotypic PYD domain interactions and can continue to polymerise, forming a large ASC speck that  
61 can be monitored through e.g. fluorescence microscopy. These ASC specks in turn recruit pro-caspase-  
62 1, resulting in its activation through proximity-induced trans-autoproteolysis. Active caspase-1 cleaves  
63 pro-IL-1 $\beta$  and pro-IL-18 into their mature and active forms, as well as gasdermin D, which allows the  
64 latter to form pores in the plasma membrane to release IL-1 $\beta$  and IL-18 [4], and, eventually, to trigger  
65 pyroptosis. However, none of these triggers suffice to activate the NLRP3 inflammasome in a healthy  
66 system, as NLRP3 needs to be licensed for activation by a priming signal (reviewed in e.g.: [5], [6]).  
67 Experimentally, LPS is usually used as a priming signal, which, through TLR4, Tak1, IKK $\beta$ , and NF $\kappa$ B  
68 affects NLRP3 at two distinct levels: through induction of gene transcription and by posttranslational  
69 licensing. Hence, activation of NLRP3 requires two or three steps, depending on whether the cell type  
70 shows a high basal expression of NLRP3 or not, including: 1) (conditionally) transcriptional priming, 2)  
71 posttranslational licensing, and 3) activation by a trigger. This three-step picture is complicated further  
72 by the apparently wide range and partially unrelated trigger effects, as well as by the fact that multiple  
73 signalling pathways control licensing through multiple modification sites in different components of  
74 the NLRP3 inflammasome. Consequently, both the nature of activation and the integration of licensing  
75 signals remain opaque.

76 In this work, we take a systems biology approach to gain understanding on the NLRP3 inflammasome  
77 mechanisms. We perform an in-depth literature review and curation to compile the existing  
78 mechanistic knowledge on NLRP3 regulation into a formal knowledge base. Briefly, we use an  
79 established workflow for reconstruction of signal transduction networks, which relies on iterative  
80 literature curation, network validation and gap-filling [7]. The goal is to provide a comprehensive  
81 mechanistic model, i.e., a model that includes all relevant components and processes of the system  
82 under study, and which describes those as an unbroken link of mechanisms and causalities from system  
83 input to output. To this end, we use rxncon, the reaction-contingency language, to formalise the

84 network in terms of elemental reactions and contingencies (see methods for details)[8, 9]. Elemental  
85 reactions represent minimal and decontextualised reaction events, similar to the reaction centre in  
86 rule-based modelling [10]. Contingencies represent the regulatory constraints on reactions, similar to  
87 the reaction context in rule-based modelling. The resulting (rxncon) knowledge base has been  
88 processed by the rxncon toolbox to visualise the network and to allow parameter-free simulation [11].  
89 In particular, we have made use of the scalable regulatory graph to visualise the information flow  
90 through the network (Figures 1-5)[8], to make the content of the knowledge base easily accessible,  
91 and to help the reconstruction process. Building such models is an excellent way to add value to  
92 existing data. The fundamental idea is to collect the available knowledge of NLRP3 activation in a single  
93 knowledge resource, much like the biochemical pathways maps of metabolism, and to analyse how far  
94 the current molecular level knowledge of NLRP3 activation can explain what is known about the system  
95 level function. In this particular case, the question raised is to what extent the molecular knowledge  
96 of NLRP3 inflammasome signalling can explain the release of mature cytokines in response to the  
97 inputs that are known to trigger this release, and to what extent the effect of known mutations or drug  
98 perturbations on this response can be reproduced in the model. Clearly, this work has a strong  
99 component of literature review. However, it also has a number of features that go further. First, the  
100 statements in a mechanistic model need to be concrete and precise, and these explicit interpretations  
101 of the data can be evaluated individually. Second, the model must be internally consistent, which  
102 means that all apparent contradictions must be resolved. Third, the model can be tested through  
103 simulation, to make sure that the expected system level function (activation or not) emerges from the  
104 assembled molecular mechanisms. Fourth, the annotated model with individual references for each  
105 model entry increase reusability, making it easy for the community to update and extend the model  
106 as new knowledge becomes available. Hence, the model constitutes an explicit and internally  
107 consistent compilation of the current molecular level knowledge that is complemented with graphs  
108 that visualise these molecular processes in detail. We envisage it as a research community resource to  
109 serve as an entry point for novices in the field, as a guide for future experiments, and as a contribution  
110 to the discussion on what really activates NLRP3.

## 111 Material and Methods

### 112 *Literature curation and network reconstruction*

113 The network reconstruction was performed with a previously developed and demonstrated workflow  
114 [7, 12, 13]. Literature curation started from a number of reviews, essentially providing an initial “parts  
115 list” in terms of components, processes and signals that can prime or trigger NLRP3. This starting point  
116 helped guide a targeted literature search in two complementary directions: First, on specific  
117 interactions, modifications, and mechanisms that constitute the actual signal transduction, to map out  
118 the actual signal transduction processes. Second, on the different trigger signals and their connection  
119 to NLRP3 activation, to determine if and how they could be attributed to a common cellular  
120 perturbation and how that perturbation could be sensed by NLRP3. PubMed, Google and perplexity.ai  
121 were used complementarily to search for literature relevant for specific questions, and these papers,  
122 together with references in initial reviews and retrieved papers, were used to build the network model.  
123 The network reconstruction was compiled in the second generation rxncon language [9] as elemental  
124 reactions and contingencies (see below). Each elemental reaction and contingency is associated with  
125 one or more references through PubMed IDs, or clearly marked as a model hypothesis (see column  
126 “!Reference:Identifiers:pubmed” in Supplementary Table 1). The following papers are referenced in  
127 the model: [6, 14-68].

128

### 129 *The rxncon language and encoding of knowledge*

130 The network reconstruction was compiled in the second generation rxncon language [9]. The rxncon  
131 network definition is based on site-specific elemental states. Importantly, elemental states capture the  
132 state at a single residue or domain, and multiple elemental states are typically needed to fully define  
133 the protein (micro)state (discussed in [69]). Elemental states do not correspond to disjunct entities, as  
134 components with multiple sites (binding domains or modification residues) are represented by  
135 multiple nodes in the graphs (e.g., each NLRP3 molecule may be phosphorylated on Ser5, Ser198,  
136 Ser295, Ser806, and/or Tyr861). The possible combinations of these states are not represented unless  
137 necessary in a contingency. E.g., AKT mediated phosphorylation of NLRP3 Ser5 requires AKT to be  
138 phosphorylated on both Thr308 and Ser473 (or bound to the activator SC79), and to be bound to  
139 phosphoinositide (PI; which in turn need to be 4-phosphorylated to bind AKT (see below)). This makes  
140 the network representation more abstract than in microstate-based formalisms such as the process  
141 description diagram formalism [70], but brings three distinct advantages: First, the elemental state  
142 representation has an excellent congruence with empirical data, making network reconstruction  
143 precise and straightforward [69]. Second, the omission of unnecessary (in the perspective of empirical  
144 data) enumeration of state combinations abrogates the combinatorial complexity [71]. Third, the  
145 (regulatory graph) representation emphasises causality, providing a clear overview of the information  
146 flow through even very complex networks [8]. The rxncon network is defined at two complementary  
147 levels that are both defined in terms of elemental states and hence both correspond directly to  
148 empirical data: (1) Elemental reactions defines decontextualised reaction events. (2) Contingencies  
149 defines contextual constraints on elemental reactions, in terms of (Boolean combinations of)  
150 elemental states or inputs.

151 Elemental state are site specific states in one or two components. For example, the Ser5  
152 phosphorylation is NLRP3\_[(Ser5)]-{P}, consisting of a component name (NLRP3), a locus (residue  
153 serine 5: \_[(S5)]) and a modification (Phosphate: -{P}). Correspondingly, the bond with NEK7 is  
154 NEK7\_[clobe]--NLRP3\_[HD2LRR], where the first protein (NEK7) via the clobe-domain (\_[clobe]) binds  
155 (--) the second component (NLRP3) via the HD2-LRR region of NLRP3 (\_[HD2LRR]). Importantly, an  
156 elemental state gives no information on the state at any other residue or domain.

157 Elemental reactions include one or two components, but are always defined through two components  
158 (A and B; which in monomolecular reactions are the same). Each component is defined at a certain  
159 resolution (Component, Domain, or Residue), depending on the reaction type and the component's  
160 role in the reaction, as described in detail elsewhere [9]. The elemental reactions contain no  
161 information on the states of the components beyond the state(s) that change through the reaction.  
162 For example, the phosphorylation of Ser5 by AKT (AKT\_P+\_NLRP3\_[(S5)]) requires the site to be  
163 unmodified (NLRP3\_[(S5)]-{0}; where "-{0}" indicates an "empty" residue), but have no other intrinsic  
164 requirements. The contextual states, i.e., those that do not change through the reaction (i.e., the  
165 requirement for AKT phosphorylation and PI binding for activation), are defined as contingencies. The  
166 elemental reactions are defined in the ReactionList sheet of Supplementary Table 1.

167 The contingencies define the regulatory constraints on reactions. The qualitative model presented  
168 here includes three types of contingencies: Required (!), inhibitory (x), and no effect (0). Simple  
169 constraints may be defined by a single contingency, e.g. that Caspase-1 processing  
170 (Caspase1\_cut\_Caspase1\_[(pro)]) require (!) Caspase-1 dimerisation (Caspase1--Caspase1). However,  
171 more complex requirements can also be accommodated by (possibly nested) Boolean combinations  
172 (AND, OR, or NOT) of Elemental states and inputs, as illustrated by AKT activation above. These  
173 Booleans are also defined in the contingency list, where the <Boolean> (identified by "<>") appears  
174 both as a target – on the lines where the <Boolean> is defined – and as modifier for elemental reactions  
175 and outputs, and when it is part of the definition of another Boolean expression (in nested Booleans).  
176 Finally, the contingency list is used to define system [Inputs] and [Outputs] (identified by "["), which  
177 constitutes the boundary of the system. The contingencies are defined in the ContingencyList sheet of  
178 Supplementary Table 1

179 In this model, we make a special use of inputs and outputs to describe Signal 2. The effects that trigger  
180 NLRP3 cannot be efficiently described at the level of single molecules, hence we use placeholder  
181 entities that are connected as a chain of inputs/outputs that control each other. While it would have  
182 sufficed to include the most downstream inputs, centrosomal PI(4)P or CL, for the model to be  
183 functional, the inclusion of the steps – even in this relatively crude format – allows us to elaborate on  
184 the hypothesis and distinguish different type of inputs – e.g. in term of potassium efflux and  
185 suppression by extracellular KCl. In addition, we deem the graph useful as an overview complementing  
186 the discussion in the text.

187 For a detailed description of the rxncon language, see: [8, 9]

188

### 189 *Visualisation, model generation and simulation*

190 The generation of the rxncon regulatory graph for visualisation and the bipartite Boolean model (bBM)  
191 for simulation was performed with the rxncon2regulatorygraph.py script and rxncon2boolnet script,  
192 respectively. Both scripts are part of the rxncon toolbox that can be downloaded from GitHub  
193 (<https://github.com/rxncon/rxncon>; without dependencies), installed from the python package index  
194 through "pip install rxncon", or through kboolnet (Carretero Chavez, et al. accepted). Simulation was  
195 performed using BoolNet as described previously [11, 13]: Starting from a highly artificial initial state,  
196 the model was simulated until it reached its natural off state. From this state, it was exposed to  
197 different treatment by setting the corresponding inputs (grey circles in the regulatory graph) to True.  
198 The signal transmission through the network and the effect on the outputs were monitored to  
199 determine if the NLRP3 inflammasome was activated or not.

## 200 Results

### 201 *The reconstruction process and scope*

202 The reconstruction process was based on manual literature curation. Starting from an overview, based  
203 on several review articles, targeted literature searches were used to clarify the relationships between  
204 components and the importance of specific modifications and bonds, as well as to connect the  
205 apparently unrelated triggers to a common mechanism of activation. The starting point is taken from  
206 the basic assumption that the molecular functions are the same across cell types, and that any  
207 difference between (isogenic) cells can be explained by expression differences rather than differences  
208 in molecular function. Inclusion of data from different organisms (primarily mouse in addition to  
209 human cells and cell lines) is less straightforward but has been used as indicated in the model.  
210 Importantly, as a mechanistic model requires direct mechanistic connections between components,  
211 components and functions can only be included when their mechanistic function in the network is  
212 known. Concretely, this means that for a molecule to be added into the model it is not enough that it  
213 has been shown to interact with e.g. NLRP3; there must also be a known functional outcome of that  
214 interaction. For example, the model does not include cathepsin B, thioredoxin-interacting protein  
215 (TXNIP), or caspase-8, despite their reported roles in NLRP3 regulation. TXNIP, which dissociates from  
216 its partner thioredoxin upon oxidative stress and elevated ROS, has been suggested as a binding  
217 partner to NLRP3 after dissociation [72]. In silico modelling of predicted binding has indicated  
218 conformational changes in the pyrin domain of NLRP3 by TXNIP binding, facilitating interactions with  
219 ASC [73]. However, TXNIP has been found to be dispensable for NLRP3 activation by ATP, MSU, and  
220 islet amyloid polypeptide [6], and subsequent knock-out studies have been inconclusive. Thus, TXNIP  
221 has not been included in the model. Also, cathepsin B has been excluded due to inconclusive literature,  
222 and studies that have shown it to be dispensable for NLRP3 activation (reviewed in [74]). Similarly, the  
223 model does not include caspase-8, as we have not found any mechanistic information on how it is  
224 connected to NLRP3 activation. Hence, as all caspase-8 dependent mechanisms are absent from the  
225 model, the model is effectively casp8<sup>-/-</sup>, and consequently NEK7 is absolutely required for NLRP3  
226 activation [75]. However, it is important to bear in mind that some of the activation seen in  
227 experimental data may be due to the caspase-8 dependent, NEK7 independent, mechanism that is not  
228 included in the model. The complete knowledge base can be found in Supplementary Table 1, and it is  
229 visualised as a rxncon regulatory graph in Figure 1 and Supplementary Figure 1. Below, the knowledge,  
230 interpretation, and implementation in the model will be described in detail.



231

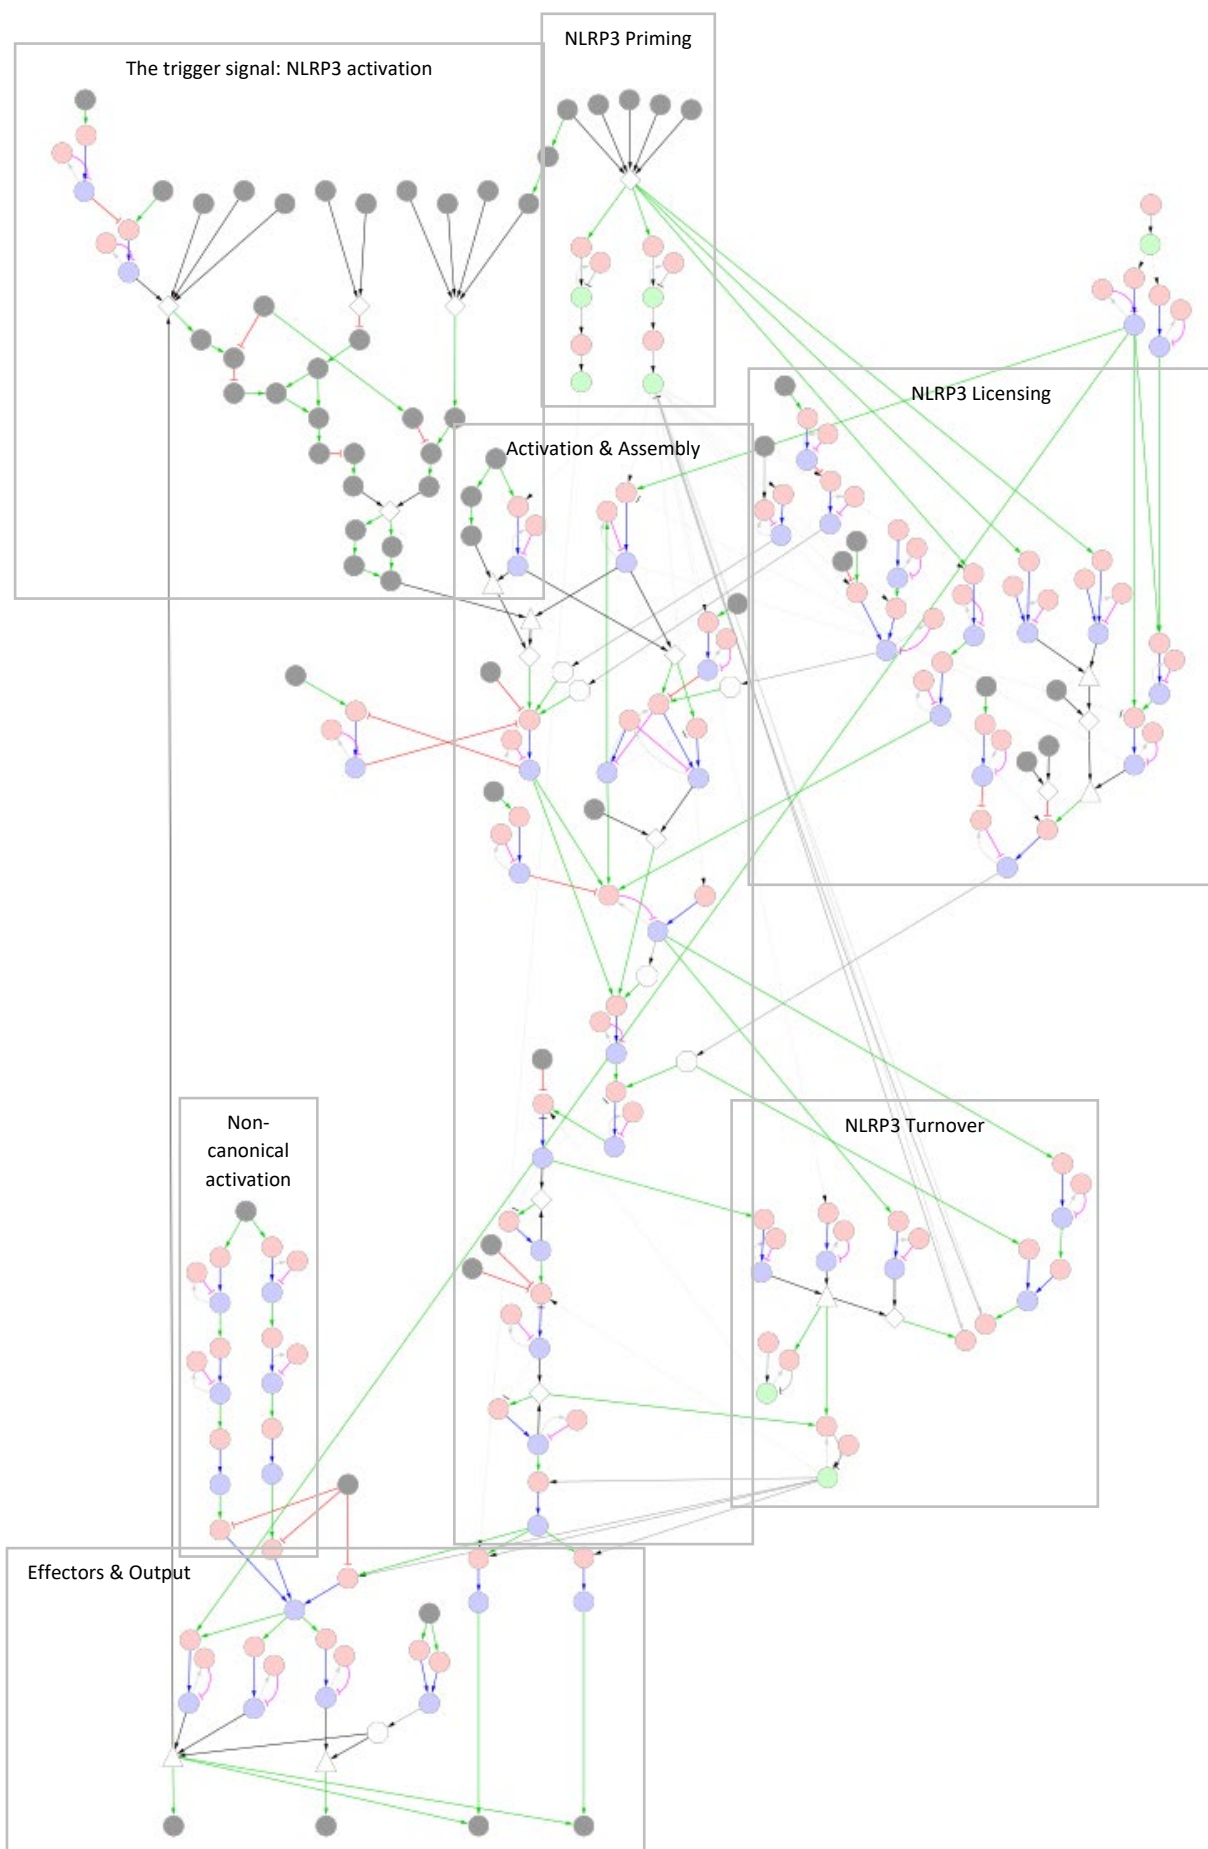

232

233 **Figure 1: The NLRP3 inflammasome network.** The NLRP3 inflammasome is activated by two signals:  
 234 Signal 1, which primes and licenses the system for activation, and Signal 2, which triggers assembly and  
 235 activation of the NLRP3 inflammasome. For clarity, the network is divided and discussed in terms of  
 236 modules, which are presented in figures 2-11 and described in detail below. Legend: Nodes represent  
 237 elemental reactions (red), elemental states (blue), components (green), and inputs/outputs (grey).  
 238 Reaction-to-state edges represent the effect of the reaction on the target state (production/synthesis  
 239 create states/components, consumption/degradation remove states/components). State-to-reaction  
 240 edges represent the regulatory effect of the state on the target reaction (! = required for reaction, x =  
 241 blocks reaction). Grey edges indicate that components or states participate in reactions. More complex  
 242 requirements are defined as AND or OR combinations of states (and/or inputs), and are represented  
 243 as white triangles and diamonds, respectively. Negation of states (NOT) are represented by white  
 244 octagons. Note that neutral (unmodified, unbound) states are excluded from the regulatory graph for  
 245 clarity. A high-resolution version with labels is included as Supplementary Figure 1.

246

### 247 *NLRP3 priming through NFκB-mediated transcription*

248 The NLRP3 inflammasome is activated in three steps: transcriptional priming, posttranslational  
 249 licensing, and triggering. Priming and licensing (also referred to as posttranslational priming) are  
 250 induced by “Signal 1”, which corresponds to exposure to PAMPs (e.g. LPS (TLR4 ligand), Pam3CSK4  
 251 (TLR1/2 ligand)), or cytokines (e.g. IL-1 or TNF), which activate signalling through Tak1, IKKα/β, and  
 252 NFκB [26, 76]. The model also includes amyloid-β aggregates, which have been found to act both as  
 253 Signal 1 and, after endocytosis, as Signal 2 [25]. Signal 1 leads to the transcriptional induction of NLRP3  
 254 and pro-IL-1β (Figure 2). The priming event is necessary for inflammasome activation in some cell  
 255 types, while others, such as human monocytes [77], have sufficiently high basal expression of NLRP3  
 256 and only need (posttranslational) licensing to enable a trigger to activate the NLRP3 inflammasome. In  
 257 the model, this is implemented as a direct dependence of NLRP3 and pro-IL-1β on Signal 1.

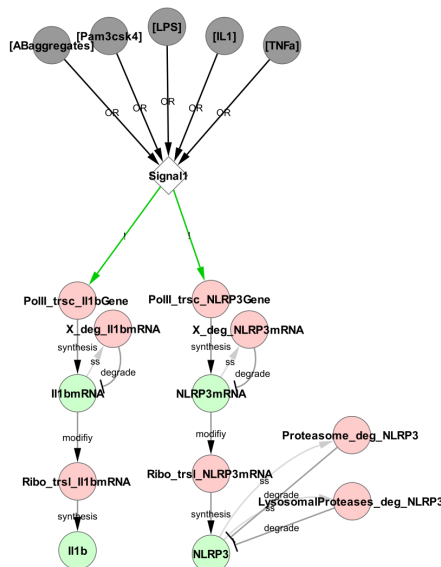

258

259 **Figure 2: Transcriptional priming of NLRP3 and pro-IL-1β.** The common denominator between the  
 260 priming and licensing signals (Signal 1) is the activation of NFκB (omitted in the model), resulting in the  
 261 transcription and translation of NLRP3 and pro-IL-1β. The mRNA is turned over (placeholder reactions  
 262 catalysed by “X”), and NLRP3 is targeted for either proteasomal or lysosomal degradation depending  
 263 on ubiquitylation (see below). The priming signals considered in this model are: LPS



264 (Lipopolysaccharides; signalling via TLR4), Pam3csk4 (a synthetic triacylated lipopeptide; signalling via  
265 TLR1/2), IL-1 (interleukin-1, signalling via IL-1R1), TNF (tumour necrosis factor, signalling via TNFR1/2)  
266 and AB-aggregates (amyloid- $\beta$  aggregates; through toll-like receptors).

267

#### 268 *NLRP3 licensing through posttranslational modification*

269 NLRP3 inflammasome activation is also controlled by posttranslational licensing. Effectively, it  
270 constrains NLRP3 activation in space and time, to ensure activation only at the right place at the right  
271 time. NLRP3 activation is restricted by several posttranslational modifications that are only partially  
272 dependent on the priming signal. The picture is somewhat complicated by the observation that  
273 overexpression of NLRP3 is sometimes sufficient to override the need of licensing, as for example in  
274 HeLa cells [32]. This may indicate that licensing only increases the probability of activation, but that  
275 activation by sheer numbers is possible even without a licensing signal. It may also indicate that NLRP3  
276 is licensed through release from a negative modification or stoichiometric inhibition, i.e. that one or  
277 more modifications or interaction partners keeps NLRP3 in an inactive state, and that the (limited)  
278 capacity of this inactivation is exhausted upon overexpression.

279 NLRP3 contains many potential modification sites. The model includes phosphorylation of Ser5,  
280 Ser198, Ser295, Ser806, and Tyr861, as the functional impact of these are mechanistically well  
281 characterised. These phosphorylation sites are spread across all three main domains of NLRP3: the PYD  
282 domain (residues 1-134), NACHT domain (residues 135-649; including the FISNA (residues 135-217)  
283 and the nucleotide binding domain (NBD)), and the LRR domain (residues 650-1036) [42]. In addition,  
284 the model accounts for K48-linked ubiquitylation of K496 – which targets NLRP3 for proteasomal  
285 degradation – and K63-linked ubiquitylation of the LRR domain – which prevents self-association and  
286 hence activation of NLRP3, and which targets NLRP3 for autophagy and hence lysosomal degradation.  
287 Apart from the control of self-association, ubiquitylation will be discussed further under NLRP3  
288 turnover below.

289 The most well understood licensing modification of NLRP3 is indeed negative (Figure 3).  
290 Phosphorylation of Ser5 in the pyrin domain (PYD) of NLRP3 inhibits homotypic PYD-PYD interactions  
291 and therefore prevents PYD polymerisation, which is required for ASC recruitment and polymerisation  
292 [56]. Ser5 is phosphorylated by AKT [40] and dephosphorylated by PP2A $\alpha$  [56]. AKT is considered  
293 constitutive [40] and activated by phosphorylation on Thr308 (by PDK1) and Ser473 (by mTORC2) [63],  
294 and by binding to PI(3,4)P2 or PI(3,4,5)P3 [18]. Hence, this constitutive activity is likely to be spatially  
295 restricted to membrane containing these phosphoinositides, i.e., primarily the plasma membrane and  
296 early endosomes [18]. This suggests that Ser5 phosphorylation imposes a spatial restriction on NLRP3  
297 activation, consistent with the lack of ASC speck formation at the plasma membrane. However, AKT  
298 has also been shown to be activated by Tbk1/IKK $\epsilon$  in a (LPS-) priming dependent fashion [46], in which  
299 the priming signal leads to a transient Tbk1/IKK $\epsilon$  activation that delays and/or reduces the assembly  
300 of the NLRP3 inflammasome and hence IL-1 $\beta$  release [53]. Phosphorylation of Ser5 also stabilises  
301 NLRP3 [40], suggesting that activation leads to increased turnover of NLRP3.

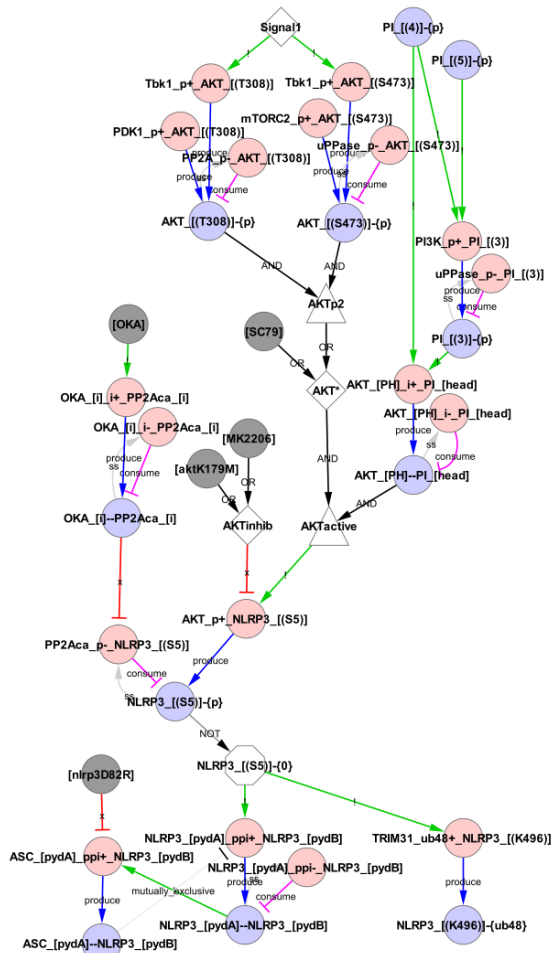

302

303 **Figure 3: PYD polymerisation and ASC recruitment is inhibited by Ser5 phosphorylation.**

304 Inflammasome assembly requires formation of a NLRP3-PYD filament, which nucleates an ASC-PYD  
 305 filament through homotypic PYD-PYD interactions, and these interactions are prevented by Ser5  
 306 phosphorylation. Ser5 phosphorylation is controlled by AKT, which is constitutively active at the plasma  
 307 membrane. However, AKT activity is also increased by Signal 1-dependent Tbk1 phosphorylation,  
 308 introducing a possible time delay to polymerisation upon priming. In addition, Ser5 phosphorylation  
 309 has been reported to stabilise NLRP3 by preventing K48-linked polyubiquitylation of Lys496 and hence  
 310 proteasomal degradation of NLRP3.

311

312 In contrast to the inhibitory Ser5 phosphorylation, priming-dependent Ser198 phosphorylation is  
 313 required for inflammasome assembly and IL-1 $\beta$  release (Figure 4). Ser198 is phosphorylated by JNK1  
 314 upon priming, and this phosphorylation is essential for self-association and hence oligomerisation of  
 315 NLRP3 [17]. Phosphorylation of Ser198 also decreases ubiquitylation of NLRP3 [17], by inhibiting  
 316 ubiquitylation, promoting deubiquitylation, or both. Hence, Ser198 phosphorylation may constitute a  
 317 priming dependent switch between inflammasome assembly and degradation. The Ser198 residue is  
 318 localised in the FISNA domain (residues 138-208) [78], which is the region that undergoes the largest  
 319 structural changes during NLRP3 activation [42]. The fact that overexpression of NLRP3 can overcome  
 320 this licensing requirement, strongly suggests that it is the deubiquitylation (negative licensing) rather  
 321 than the phosphorylation (positive licensing) that control NLRP3 assembly. In the model, Ser198  
 322 phosphorylation is directly required for deubiquitylation of the leucine-rich repeats (LRR) domain of  
 323 NLRP3 and, through this effect, indirectly promotes self-association of NLRP3.

324 The Ser198-mediated effect converges with the effects of Ser806 and Tyr861 phosphorylation. Ser806  
 325 phosphorylation has been shown to prevent NEK7 interaction and, through this, to prevent BRCC36  
 326 dependent deubiquitylation of the LRR-domain of NLRP3 [20]. Again, ubiquitylation in NLRP3 prevents  
 327 its self-association and hence the assembly of a signalling competent inflammasome. Ser806 is  
 328 targeted by casein kinase (CSNK1a1), which is presumed to be constitutively activated [20], suggesting  
 329 that phosphorylation of this site also may impose a spatiotemporal restriction on NLRP3 activation  
 330 rather than constitute an actual priming event. Similarly, the Tyr861 phosphorylation interferes with  
 331 NEK7 recruitment [19], but is not known to be regulated in response to either Signal 1 or 2 [57]. In the  
 332 model, both Ser806 and Tyr861 must be unphosphorylated for NLRP3 to bind NEK7, and NLRP3 must  
 333 bind NEK7 to allow BRCC36 mediated deubiquitylation of the LRR domain.

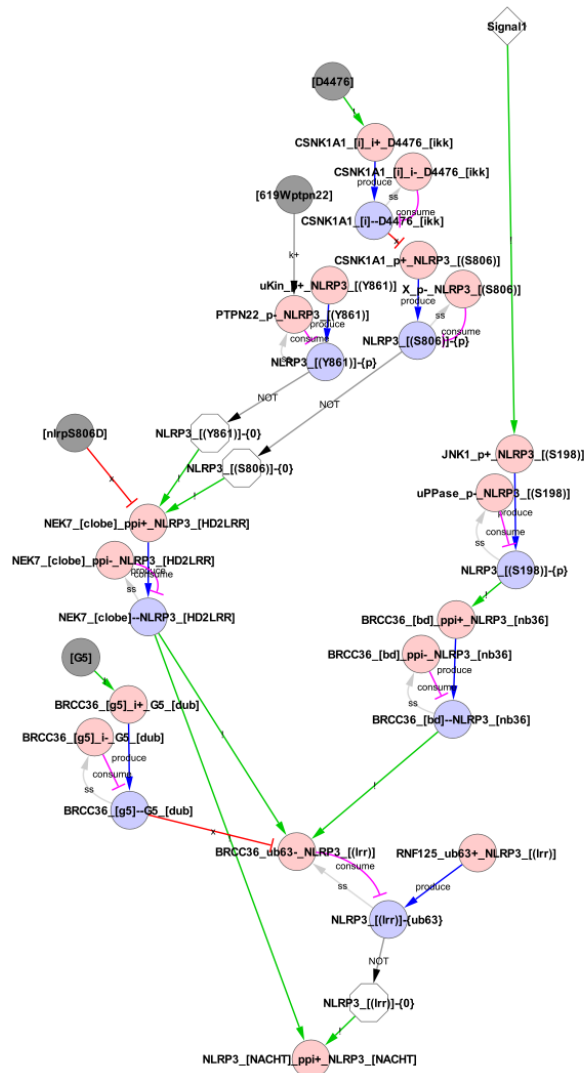

334

335 **Figure 4: Control of NEK7 recruitment and BRCC36-dependent deubiquitylation of the LRR domain.**

336 Phosphorylation of Ser806 and Tyr861 prevents NEK7 recruitment and thereby BRCC36 dependent  
 337 ubiquitylation, but does not appear to be regulated by Signal 1 or 2, suggesting that phosphorylation  
 338 of Ser806 and/or Tyr861 may impose a spatiotemporal restriction on NLRP3 activation. In contrast,  
 339 JNK1 dependent phosphorylation of S198 constitute a bona fide licensing event, as it depends on Signal  
 340 1 and is a prerequisite for BRCC36-dependent deubiquitylation of the LRR domain, for NLRP3 self-  
 341 association (encoded as an indirect dependence in the model), and hence for assembly and activation  
 342 of the inflammasome.

343

344 The phosphorylation of Ser295 has been shown to act as both a positive and negative regulator of  
345 NLRP3 activation (Figure 5). This is consistent with its role in controlling the ATPase activity of NLRP3,  
346 as both ATP binding and hydrolysis has been found to be important for NLRP3 activation [6, 66]. Ser295  
347 is phosphorylated by both PKA [21] and PKD [14]. The Ser295 phosphorylation has been shown to  
348 prevent NLRP3 activation [21], but at the same time to be necessary for NLRP3 release from Golgi  
349 membranes and relocation to the compartment of activation, as discussed further below [14]. This  
350 implies that the ATPase activity or ADP-bound form helps NLRP3 to dissociate from the membrane,  
351 and that the Ser295 phosphorylation positively affects this. In the model, this is implemented as an  
352 inhibition by Ser295 phosphorylation of the ADP to ATP exchange, with the result that NLRP3 will  
353 favour the ADP bound form. Similarly, the NLRP3 inhibitor MCC950 is considered an ATPase inhibitor  
354 [68] but stabilises the inactive ADP bound form [79]. This is more consistent with an inhibition of ADP-  
355 to-ATP exchange, indirectly decreasing the ATPase activity through reduced exchange, and hence this  
356 is the mechanisms implemented in the model.

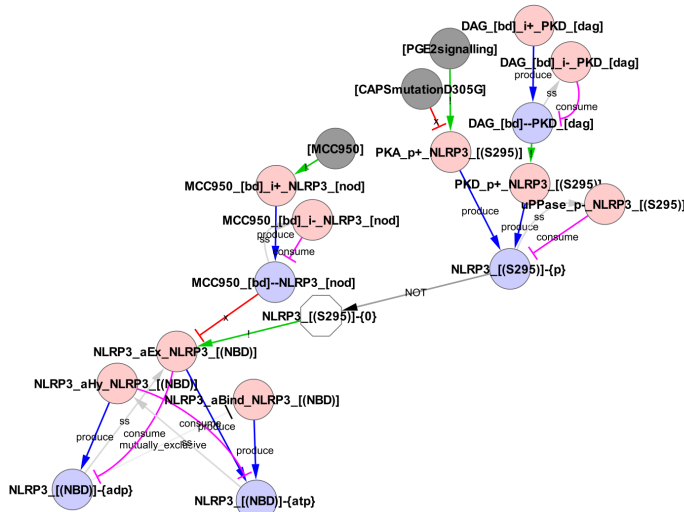

357

358 **Figure 5: Regulation of the ATPase cycle by MCC950 and Ser295 phosphorylation.** Phosphorylation  
359 of NLRP3 at Ser295 is controlled by both PKA and PKD, and it has been ascribed both positive and  
360 negative roles in NLRP3 regulation. These effects have been attributed to inhibition of the ATPase  
361 activity, but, like MCC950, it appears more likely that they stabilise the ADP-bound form by preventing  
362 nucleotide exchange – which would decrease the apparent ATPase activity without shifting NLRP3  
363 towards an ATP-bound active form.

364

365

| <b>Table 1: NLRP3 inflammasome triggers by trigger class</b>   | <b>KCl</b> | <b>P/E</b> | <b>Reference(s)</b> |
|----------------------------------------------------------------|------------|------------|---------------------|
| <b>Type I (Ionophorous)</b>                                    |            |            |                     |
| Aerolysin, hemolysin and MARTX ( <i>Aeromonas</i> )            | Y          | N/A        | [80]                |
| ATP                                                            | Y          | N/A        | [37, 81]            |
| Biglycan                                                       |            | N/A        | [82]                |
| Exolysin ( <i>Pseudomonas</i> )                                | Y          | N/A        | [83]                |
| Hemolysin and non-hemolytic enterotoxin ( <i>Bacillus</i> )    | Y          | N/A        | [84, 85]            |
| Hemolysin, M1 protein and pneumolysin ( <i>Streptococcus</i> ) | Y          | N/A        | [86-88]             |
| Hemolysins ( <i>Escherichia</i> )                              | Y          | N/A        | [89, 90]            |
| Hemolysins and leukocidins ( <i>Staphylococcus</i> )           | Y          | N/A        | [91-95]             |
| Hemolysins and MARTX ( <i>Vibrio</i> )                         | Y          | N/A        | [96, 97]            |
| Listeriolysin O ( <i>Listeria</i> )                            | Y          | N/A        | [98]                |
| Nigericin and valinomycin ( <i>Streptomyces</i> )              | Y          | N/A        | [16, 99, 100]       |
| Perfringolysin O and tetanolysin O ( <i>Clostridium</i> )      | Y          | N/A        | [101, 102]          |
| Serum amyloid A (SAA)                                          |            | N/A        | [103]               |
| Shiga toxins ( <i>Shigella</i> )                               | Y          | N/A        | [104]               |
| <b>Type II (lysosomal destabilisation)</b>                     |            |            |                     |
| Alum                                                           | Y          | Y          | [105, 106]          |
| Amyloid- $\beta$ (fibrillar)                                   |            | Y          | [107]               |
| Asbestos                                                       | Y          | Y          | [108]               |
| Calcium pyrophosphate dihydrate crystals (CPPD)                | Y          | Y          | [106, 109]          |
| Carbon nanotubes                                               | Y          | Y          | [110, 111]          |
| Chitosan                                                       | Y          | Y          | [99, 112]           |
| Cholesterol crystals                                           | Y          | Y          | [113, 114]          |
| Copper oxide nanoparticles                                     |            | Y          | [115]               |
| Dextran sodium sulfate (DSS)                                   | Y          | Y          | [116]               |
| Graphene oxide                                                 |            | Y          | [117]               |
| Hyaluronan                                                     |            | Y          | [118]               |
| Leu-Leu-O-methyl ester (LLOMe)                                 | Y          | N/A        | [62, 106]           |
| Monosodium urate crystals (MSU)                                | Y          | Y          | [37, 105]           |
| Oxidised LDL                                                   | Y          | Y          | [119]               |
| Quartz/silica crystals                                         | Y          | Y          | [105, 106]          |
| <b>Type III (ETC inhibitors)</b>                               |            |            |                     |
| CL097                                                          | N          | N/A        | [37]                |
| Imiquimod                                                      | N          | N/A        | [37]                |

366 **Table 1: NLRP3 inflammasome triggers by trigger class.** The triggers can be divided into three general  
 367 categories: (I) ionophoric compounds and compounds triggering ion fluxes indirectly (such as  
 368 extracellular ATP), (II) compounds destabilising the lysosomes, and (III) inhibitors of the mitochondrial  
 369 electron transport chain (ETC). Most, but not all, triggers can be suppressed by high extracellular KCl  
 370 (column KCl, Y=Yes, can be suppressed, N=No, cannot be suppressed). Most lysosomal destabilising  
 371 compounds require phagocytosis or endocytosis (P/E), with the exception of LLOMe. N/A = not  
 372 applicable, blanks = no information found.

373

374 *The trigger signal: NLRP3 activation*

375 After priming and licensing, NLRP3 can be activated by a wide range of triggers (“Signal 2”). It is an  
376 outstanding question if these triggers converge on one common signal, and, if so, what the actual  
377 trigger signal is. The known NLRP3 triggers can be divided into three general categories (Table 1), in  
378 this article labelled Type I - III: Type I triggers (e.g., nigericin or ATP via P2X7) cause ion fluxes, Type II  
379 triggers (e.g., MSU or LLOMe) causes lysosomal damage, Type III triggers (e.g., imiquimod and CL097)  
380 inhibit the mitochondrial electron transport chain. Some of these triggers can be suppressed by KCl,  
381 leading to the suggestion that K<sup>+</sup> efflux constitutes the trigger signal, but some triggers – notably Type  
382 III triggers – are insensitive to external KCl [37]. Nigericin activation can also be blocked without  
383 affecting K<sup>+</sup> efflux [120], showing that K<sup>+</sup> efflux cannot be the actual trigger mechanism. Other  
384 proposed unifying mechanisms, such as ROS production, have also been discarded as exceptions have  
385 been discovered [106]. These findings suggest that either the three trigger classes activate NLRP3 in  
386 different ways, or, maybe more likely, that the trigger mechanism is even more fundamental.

387 The existence of such a fundamental feature of NLRP3 activation could be related to cellular energy  
388 metabolism. All NLRP3 triggers perturb cellular energy, either by increasing ATP consumption through  
389 uncoupling of transmembrane ion pumps (Types I and II) or by disrupting ATP production (Type III). In  
390 line with this, NLRP3 is an ATPase [66], ATP-binding is essential for activity [66], as is ATP hydrolysis  
391 [6]. The most potent NLRP3 specific inhibitor, MCC950, is thought to block NLRP3’s ATPase activity  
392 [68], although this is disputed [121]. In addition, specific phosphorylation at Ser295 blocks NLRP3’s  
393 ATPase activity [6], and several mutations in the vicinity of this phosphorylation site is found in  
394 Cryopyrin-associated periodic syndromes (CAPS) [21], which are associated with spontaneous NLRP3-  
395 dependent inflammation. The CAPS mutations in the nucleotide binding domain (NBD) appear to have  
396 a higher affinity for ATP and thereby to stabilise the open, ATP-bound conformation [122]. For  
397 example, the R262W mutation increases speck formation [121], consistent with the predicted increase  
398 in ATP-binding affinity [122]. However, most NLRP3 mutations that decrease the ATPase activity  
399 prevent speck formation [121]. As the ATP-bound form of NLRP3 has been established as active [42],  
400 these apparently contradictory findings suggest that also the ATPase cycle is important for NLRP3  
401 function. However, as a chimeric NLRP3-NLRP6 protein, containing the NLRP6 NBD, responds to  
402 triggers in a similar manner as NLRP3 [16], it is unlikely that NLRP3 itself acts as an energy sensor.  
403 Instead, cellular energy may influence something else that NLRP3 is able to sense.

404 Approaching the problem from the other end, it is known that licensed NLRP3 can assemble and  
405 activate on two different lipids: cardiolipin (CL) [64] and phosphoinositol-4-phosphate (PI(4)P) [29].  
406 Incidentally, these lipids are also targeted by gasdermin D [23], the pore forming executioner of  
407 pyroptosis and ultimate effector of NLRP3 inflammasome activation [28]. In the (casp8 -/-) model  
408 presented here, where NLRP3 activation absolutely depends on NEK7 [75], NLRP3 would need to reach  
409 the centrosome, where NEK7 is localised [123], in order to be activated. Consistently, NLRP3 activation  
410 has been found to depend on microtubule-based transport to bring NLRP3 to the centrosome and  
411 NEK7 [124]. It is worth stressing that caspase-8 is known to be recruited to and activated by CL [125],  
412 pointing to a possible mechanistic role of caspase-8 in NLRP3 activation as well as a potential difference  
413 of the NLRP3 activation by CL and PI(4)P. However, the mechanistic role of caspase-8 in NLRP3  
414 activation remains uncertain [126], and there is evidence for a role for microtubule transport also of  
415 mitochondria in NLRP3 activation [127]. For the purpose of this model, NLRP3 needs to reach NEK7 at  
416 the centrosome for NLRP3 inflammasome activation both by PI(4)P and CL binding.

417 Cardiolipin (CL) is a bacterial lipid. In healthy eukaryotic cells, CL is only found in the inner  
418 mitochondrial membrane [128]. CL is only exposed to the cytoplasm and to NLRP3 binding after the  
419 outer mitochondrial membrane has been compromised, e.g. after the Mitochondrial membrane



420 permeability transition (MPT) [129] and rupture of the outer mitochondrial membrane [130], or after  
421 CL translocation to the outer mitochondrial membrane in response to e.g. apoptotic stimuli [131].  
422 Hence, in the absence of apoptotic signals, CL-mediated NLRP3 activation requires substantial  
423 mitochondrial damage or an intracellular bacterial infection. CL exposure in the mitochondrial  
424 membrane is a known damage signal inducing mitophagy [132], and in the context of infection (NLRP3  
425 priming) it constitutes a danger signal. MPT may be triggered by a  $\text{Ca}^{2+}$ -dependent pore opening, which  
426 is sensitised by e.g., oxidative stress or mitochondrial membrane depolarisation [130], offering an  
427 explanation to the conflicting reports on ROS regulation of NLRP3. Importantly, NLRP3 has been shown  
428 to interact with CL, and this interaction depend on an NLRP3 trigger signal (shown for type I (ATP) and  
429 II (Silica) triggers; [64], supporting the notion that NLRP3 triggers cause mitochondrial damage.

430 In contrast to CL, PI(4)P is constitutively present at cytoplasmic membranes and hence constitutively  
431 available for NLRP3 binding. Under normal conditions, it is found associated with the plasma  
432 membrane and Golgi [133], and it accumulates in autophagosomes [134], Rab7 positive late  
433 endosomes/lysosomes [133], and in Rab7 positive late-stage phagosomes [135]. Exposure of cells to  
434 NLRP3 triggers leads to an accumulation of PI(4)P-containing vesicles, and this accumulation is  
435 independent of NLRP3 [29]. These vesicles were initially thought to represent a dispersed trans-Golgi  
436 network (dTGN) due to the presence of the TGN38/46 marker, but TGN38/46 itself shuttles to the  
437 plasma membrane and back through endosomes, and this transport is known to be impaired by NLRP3  
438 triggers [136]. Hence, these compartments likely correspond to PI(4)P-containing late endosomal Rab7  
439 positive vesicles [133], and they likely accumulate due to endosomal trafficking defects [137]. NLRP3  
440 triggers are known to impair endosomal acidification [37], and impaired endosomal acidification has  
441 been shown to impair trafficking and to prevent return of TGN38/46 to the TGN [138], explaining the  
442 accumulation of these vesicles. Even in plants, V-ATPase inhibition leads to accumulation of vesicles  
443 [139] that are enriched in PI(4)P [140], suggesting that this is a highly conserved and hence  
444 fundamental process. Consistently, genetic disruptions of endosomal trafficking, resulting in  
445 accumulation of PI(4)P containing endosomes, trigger the NLRP3 inflammasome upon priming [32].  
446 Importantly, the assembly of NLRP3 on late endosomal vesicles enables microtubule-based transport  
447 to the centrosome [141], possibly via Rab7/RILP interaction with Dynein [142], where NLRP3 can  
448 interact with NEK7 to assemble an active inflammasome [58]. This mobility may be the key difference  
449 to NLRP3 recruitment to PI(4)P on the plasma membrane or TGN. In line with this, permanent PI(4)P  
450 localisation did not activate NLRP3 without a trigger [29]. In fact, release of NLRP3 from Golgi PI(4)P  
451 was essential for activation [14]. Importantly, the accumulation of TGN38/46 positive endosomal  
452 vesicles has been observed for all three types of NLRP3 triggers: (I) nigericin, (II) LLOMe, and (III)  
453 imiquimod, making it the most general feature of NLRP3 activation yet identified [137]. However, it  
454 leaves the question to why those vesicles accumulate.

455 Again, the evidence points towards cellular energy: i) endolysosomal acidification requires ATP, ii)  
456 intracellular ATP has been shown to decrease in response to NLRP3 stimuli through  $\text{K}^{+}$ - and  $\text{Ca}^{2+}$ -  
457 mediated mitochondrial dysfunction, and iii) artificial decrease of intracellular ATP through inhibition  
458 of glycolysis has been shown to trigger NLRP3 [143]. Moreover, triggering of NLRP3 through P2X7  
459 involves mobilisation of mitochondrial potassium [15]. Recently, ATP-generation in mitochondria was  
460 found to be driven to a large extent by the secondary  $\text{K}^{+}$  gradient [35] (generated by the mitochondrial  
461  $\text{H}^{+}/\text{K}^{+}$  antiporter [52]), providing a possible mechanistic explanation to how potassium outflux could  
462 lead to a strong and immediate reduction of ATP production. This also provides a possible explanation  
463 for why Type III triggers are insensitive to KCl supplementation, as inhibition of the mitochondrial  
464 electron transport chain (ETC) would disrupt both the primary  $\text{H}^{+}$  and the secondary  $\text{K}^{+}$  gradient over  
465 the mitochondrial inner membrane. In addition, NLRP3 triggers cause  $\text{NAD}^{+}$  to decrease, and  $\text{NAD}^{+}$   
466 supplementation has been shown to prevent NLRP3 activation [127]. This effect has been found to

467 depend on SIRT2 and possibly on  $\alpha$ -tubulin deacetylation, suggesting that low NAD<sup>+</sup> drives dynein  
468 dependent transport towards the centrosome [127]. However, NAD<sup>+</sup> is also an essential cofactor in  
469 glycolysis and a drop in reoxidation of NADH through ETC inhibitors (like the NLRP3 triggers Imiquimod  
470 and CL097 [37]) would lead to a strong reduction in glycolytic ATP production as well. It is worth  
471 pointing out that endolysosomal pumps appear to be supplied at least partially by endolysosomally  
472 localised GAPDH, which uses NAD<sup>+</sup> as a cofactor to produce ATP [144]. Moreover, GAPDH inhibition  
473 can – as inhibition of glycolysis in general – trigger NLRP3 activation [143, 145], although this of course  
474 have an impact on global energy levels. Consistently, direct inhibition of the lysosomal V-ATPase has  
475 been shown to trigger NLRP3, and this activation cannot be prevented by external supplementation of  
476 K<sup>+</sup> [146]. This would be consistent with a model in which decreasing cellular energy levels leads to loss  
477 of (internal, proton-gradient driven) membrane potential, which in turn is sensed through its effect on  
478 intracellular trafficking. Hence, the above evidence converges on a scenario where NLRP3 responds to  
479 energy by detecting compromised membranes that are rerouted due to the lack of appropriate  
480 membrane potential.

481 The evidence on a role for cellular energy in inflammasome activation is also consistent with disruption  
482 of another key physiological feature: osmotic integrity. Animal cells lack cell walls, and hence must  
483 maintain isoosmolarity at all times or they will shrink, swell, or rupture [147]. As cells contain large  
484 amounts of osmotically active compounds, such as proteins and metabolites, they must compensate  
485 these with a net gradient of inorganic ions to maintain isoosmolarity [148]. The primary architect of  
486 this gradient is the Na<sup>+</sup>/K<sup>+</sup>-ATPase that establish a gradient over the plasma membrane. The relatively  
487 high permeability to K<sup>+</sup> allows this ion to approach its equilibrium potential, maintaining an electric  
488 gradient over the plasma membrane. This in turn drives the outflow of Cl<sup>-</sup>, and this creates the “osmotic  
489 room”, which is necessary for accommodating all essential biomolecules within the cytoplasm while  
490 maintaining a zero osmotic pressure over the plasma membrane [149]. If this gradient is compromised,  
491 the cell will start taking up water, swell, and eventually burst, and, consequently, detection of this  
492 gradient collapse is an acute danger signal. Several lines of evidence suggest that such a gradient  
493 collapse could be the fundamental trigger for NLRP3 activation. First, NLRP3 is activated by  
494 hypotonicity, and this activation is conserved from mammals to fish [120]. Second, hypertonic  
495 solutions prevent NLRP3-dependent IL-1 $\beta$  release in response to triggers such as nigericin and MSU  
496 [120]. Third, the “symptoms” of hypoosmotic stress is similar to NLRP3 activation, including release of  
497 KCl in order to reduce the volume of “osmotically swollen” cells [148]. Fourth, the endolysosomal  
498 system, the site of (PI(4)P dependent) NLRP3 activation, is considered the “osmometers” of the cell,  
499 playing a key role in adaptation to and survival in hypotonicity [150]. Fifth, Rab7 positive vesicles are  
500 involved in the acute response to hypotonicity, by absorbing water and excreting it on the outside, and  
501 this function relies on the V-ATPase as inhibition with Baf-A1 inhibits vacuolisation and massively  
502 increase cell death in response to hypoosmotic shocks [151], mirroring the conditions of NLRP3  
503 activation. Hence, the activation of NLRP3 on PI(4)P positive endolysosomes could indicate an osmotic  
504 problem.

505 This reasoning leaves the question to how the NLRP3 triggers affect the inorganic ion gradient. The  
506 simplest answer may again be cellular energy. The maintenance of the inorganic ion gradient over the  
507 plasma membrane is energy expensive (estimated 25-75% of the total cellular ATP consumption,  
508 depending on cell type), and the pump activity is known to strongly depend on the intracellular ATP  
509 concentration [152]. A drop in Na<sup>+</sup>/K<sup>+</sup>-ATPase activity below the threshold needed to maintain this Cl<sup>-</sup>  
510 gradient will invariably lead to an influx of water, cell swelling, and, eventually, cell rupture [147].  
511 Indeed, the decreased activity of the Na<sup>+</sup>/K<sup>+</sup>-ATPase has been proposed as the main mechanism  
512 mediating ATP deficiency-induced apoptosis [153]. Consistently, inhibitors of the Na<sup>+</sup>/K<sup>+</sup>-ATPase, such  
513 as Ouabain or Digoxin, trigger NLRP3 after priming with LPS [154]. Importantly, significant K<sup>+</sup> efflux

514 requires a collapse of the electrical gradient or compensatory transport of other ions, and hence  
515 ATP/P2X7 (cation influx) dependent IL-1 $\beta$  activation does not occur in the absence of extracellular Na<sup>+</sup>  
516 and Ca<sup>2+</sup> [38]. Similarly, Cl<sup>-</sup> channel inhibitors specifically target K<sup>+</sup> outflux dependent triggers (nigericin,  
517 not imiquimod [155]), highlighting the importance of co- or counter-fluxes for K<sup>+</sup> efflux. It is worth to  
518 mention that disruption of the normal regulatory volume decrease (RVD), through knock-out of the  
519 volume-regulated anion channel (VRAC [150]) LRRC8A has no effect on NLRP3 activation by type I, II  
520 or III stimuli [155], which would be consistent with an insufficient pump activity as the underlying  
521 cause. In fact, type II stimuli has been shown to induce K<sup>+</sup> leakage into the lysosomes, causing  
522 hyperpolarisation and lysosomal rupture [30] that precedes NLRP3 activation [156]. Of note, the  
523 lysosomal integrity can be rescued by increasing internal K<sup>+</sup> through high external KCl [30].  
524 Furthermore, phosphatidylinositol-4 kinase type 2a (PI4K2A) accumulates rapidly on damaged  
525 lysosomes after LMP, to generate high levels of PI(4)P [157] that allow the compromised lysosome to  
526 serve as a platform for NLRP3 activation. Hence, we hypothesise that NLRP3 is activated by intracellular  
527 trafficking problems originating from compromised osmotic regulation of the intracellular membranes,  
528 which are tagged by PI(4)P.

529 How does this then lead to NLRP3 activation? A recent study found that the N-terminal part of NLRP3  
530 was sufficient to impose nigericin (type I), MSU (type II), and imiquimod (type III) regulation of a NLRP3-  
531 NLRP6 chimera [16]. Inclusion of residues 1-132 of NLRP3 is sufficient for at least partial regulation that  
532 is sensitive to external KCl for type I and II, but not type III, stimuli. Conversely, deletion of residues 92-  
533 148, but not residues 92-132, is sufficient to completely abolish this regulation in NLRP3 [16]. This  
534 region of NLRP3 contains one notable feature: the KMKK<sup>132</sup> (mouse KKKK) motif required to recruit  
535 NLRP3 to PI(4)P [29]. This motif, however, does not seem critical in human cells, which may be due to  
536 a second polybasic region (RKKYRKYVRSR<sup>145</sup>; [16]), and this redundancy would explain the apparently  
537 contradictory observation that residues 1-132 is sufficient but not required for regulation. Both these  
538 motifs lie within the short stretch required and sufficient to impose NLRP3-like regulation on the  
539 NLRP3-NLRP6 chimera, i.e. to make the chimera responsive to LPS plus nigericin in a KCl dependent  
540 manner [16]. Hence, these data strongly suggests that the common trigger of NLRP3 is its recruitment  
541 to PI(4)P. However, this recruitment is required, but not sufficient, for inflammasome activation [29],  
542 likely reflecting the need for assembly on mobile vesicles that can reach the centrosome and the  
543 essential interaction partner NEK7. Based on this reasoning, we propose a model where membrane  
544 recruitment and transport to the centrosome combine into a trigger signal for NLRP3 (Figure 6).

545

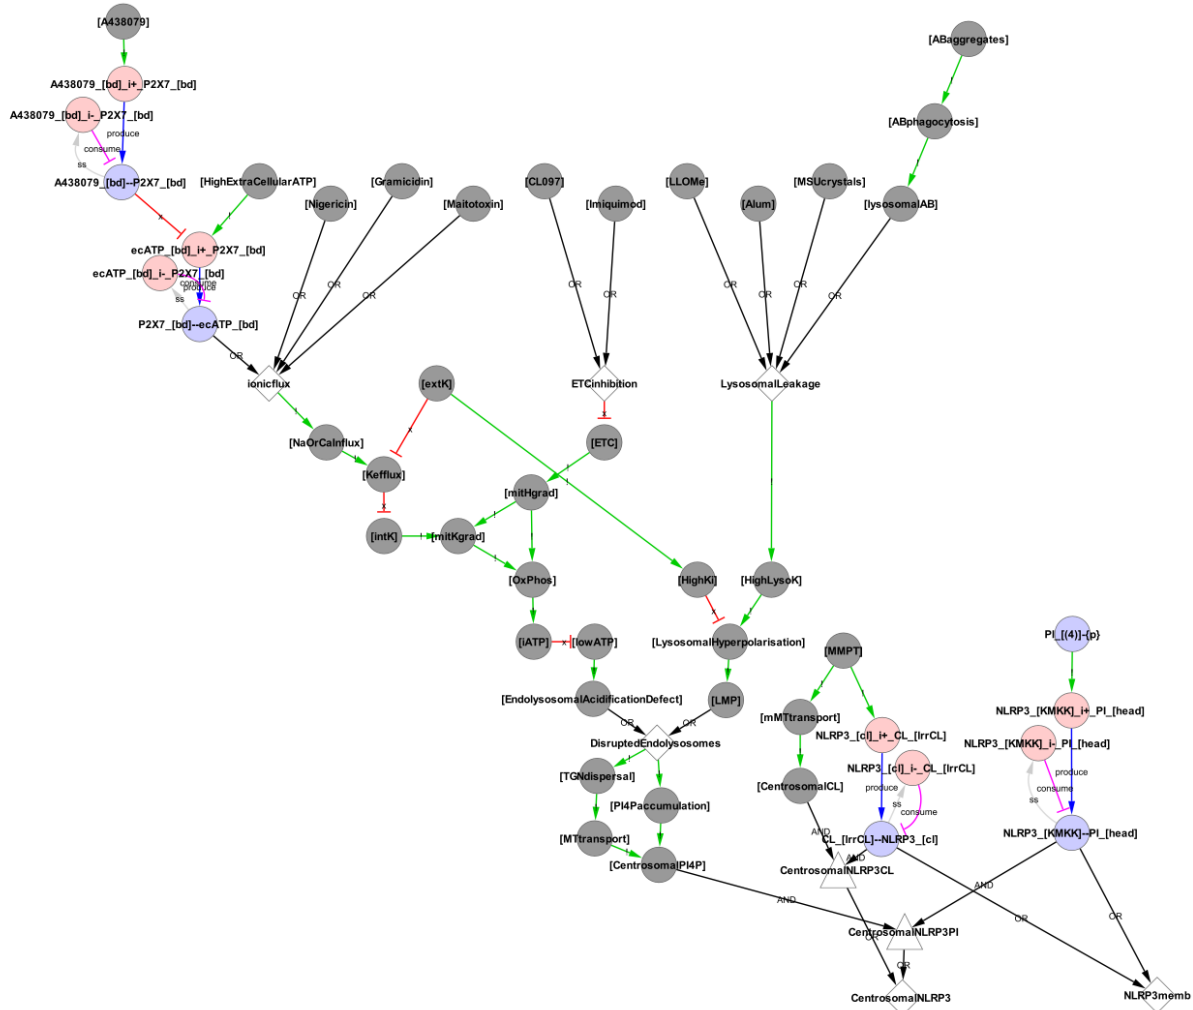

546

547 **Figure 6: A unifying hypothesis for NLRP3 inflammasome activation.** Based on current molecular  
 548 knowledge, we propose that the common feature of all NLRP3 triggers is that they cause osmotic  
 549 disruption of internal membranes and transport of those compartments to the centrosome for  
 550 interaction with NEK7. For cardiolipin (CL)-dependent recruitment (right), this scenario would require  
 551 mitochondrial membrane permeabilization (MMPT) to expose CL for interaction with NLRP3 and  
 552 mitochondrial transport to the centrosome and NEK7. However, this is highly tentative as discussed  
 553 below. For phosphoinositol-4-phosphate (PI(4)P)-dependent recruitment, the evidence is stronger as  
 554 discussed in the text. Briefly: Type I triggers cause Na<sup>+</sup> and/or Ca<sup>2+</sup> influx, which in turn allow K<sup>+</sup> efflux.  
 555 Sinking intracellular potassium levels (which can be suppressed by external KCl) impair ATP generation  
 556 in the mitochondria, and the sinking energy levels – possibly in combination with uncontrolled ion  
 557 fluxes over internal membranes – disrupts endolysosomal acidification and hence osmotic control.  
 558 Type III triggers achieve the same outcome by direct inhibition of the ETC. Type II triggers have been  
 559 shown to directly destabilise lysosomes, which burst due to the rising osmotic pressure. Type III  
 560 triggers could also disrupt the mitochondrial osmotic control, triggering MPT and CL exposure,  
 561 together with mitochondrial transport to the centrosome upon failed mitophagy. Similarly, ionophores  
 562 could directly destabilise internal compartments such as endosomes with the same result. In all these  
 563 scenarios, the ultimate reason for NLRP3 activation would be osmotic lysis or loss of membrane  
 564 potential, resulting in an accumulation of compromised internal compartments that accumulate PI(4)P  
 565 and are mobile enough to reach the centrosome for inflammasome activation.

566

### 567 *NLRP3 inflammasome activation and assembly*

568 The above suggested NLRP3 activation process points to three key aspects of inflammasome  
569 activation: lipid binding, self-assembly, and assuming or stabilising the (ATP-bound) open  
570 conformation. PI(4)P binding allows NLRP3 to assume an open conformation (as measured e.g. by BRET  
571 [16]), which exposes its nucleotide binding domain and in turn allows ATP binding. ATP stabilised the  
572 open conformation as it is incompatible with the closed structure [42]. Hence, ADP hydrolysis is  
573 required for closing, and the intrinsic ATPase activity will return the monomeric NLRP3 to its closed  
574 state. We hypothesise that the combination of NEK7 and PI(4)P binding suffices to stabilise the open  
575 conformation and, in the context of Ser198 phosphorylation and LRR deubiquitylation, allows the  
576 formation of structured higher-order NLRP3 complexes. The importance of the ATPase cycle could be  
577 explained if ATP hydrolysis (i) is required for dissociation from PI(4)P and hence to sample different  
578 membranes, or (ii) shifts the affinity towards (de)ubiquitylating enzymes and hence the balance  
579 between signalling and degradation, or (iii) both. There is indeed evidence for both of these scenarios:  
580 phosphorylation of Ser295, which seems to favour ATP hydrolysis, has been shown to be essential for  
581 release of NLRP3 from Golgi membranes – where NLRP3 is not activated – to allow assembly of  
582 functional inflammasomes elsewhere [14]. Conversely, Ser295 phosphorylation inhibits activation,  
583 likely by stabilising the ADP-bound conformation as it is linked both to NLRP3 inhibition and decreased  
584 ATP turnover [21]. At the same time, the ATP cycle is associated with the transitions between open  
585 and close conformations. It is easy to envisage that deubiquitylation by BRCC36, which binds to the  
586 NACHT domain and acts on the LRR domain [59] is limited to the closed conformation. Both these  
587 hypotheses are implemented in the model (Figure 7).

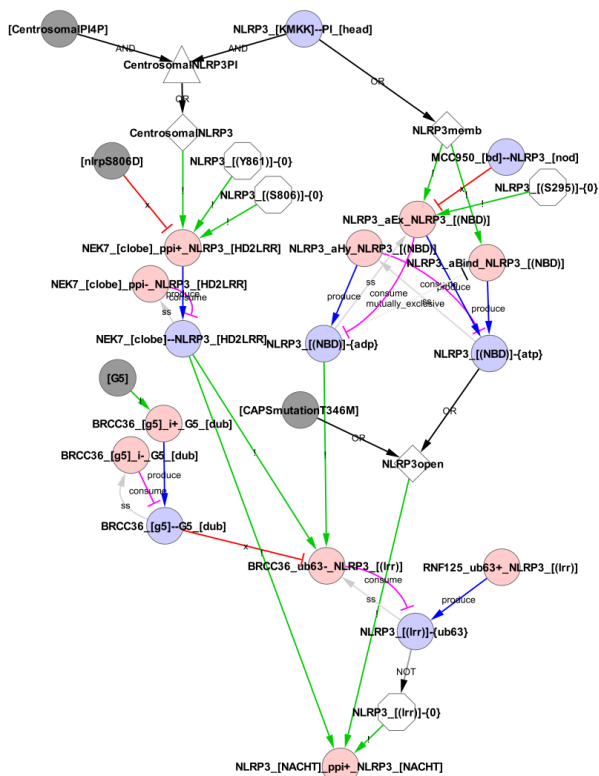

588

589 **Figure 7: A model of the activation of NLRP3.** The combination of phosphoinositol-4-phosphate  
590 (PI(4)P)-accumulation on and transport of compromised vesicles to the centrosome  
591 (“centrosomalPI4P”) with NLRP3 recruitment to PI(4)P localises NLRP3 to the centrosome where it can  
592 interact with NEK7. This interaction is controlled (prevented) by phosphorylation of NLRP3 in Ser806



593 or Tyr861, potentially restricting inflammasome activation in space, time, or intensity. At the same  
594 time, PI(4)P binding stimulate the transition of NLRP3 to the open conformation and the exchange of  
595 ADP to ATP. This transition and/or exchange is prevented by MCC950 or phosphorylation on Ser295,  
596 which stabilises the closed/ADP-bound state. The model also includes the effect of the ATP cycle on  
597 NLRP3 translocation as a requirement of NLRP3 dissociation from PI(4)P (and hence membranes) on  
598 ATP hydrolysis (the ADP bound state in the model) and by limiting deubiquitylation to the closed (ADP  
599 bound) conformation. Ser198 phosphorylation (Signal 1 priming via JNK1) is modelled as absolutely  
600 required – in combination with NEK7 binding – to allow BRCC36-mediated deubiquitylation of NLRP3s  
601 LRR domain, which in turn is necessary for self-association of NLRP3 – the first step of inflammasome  
602 assembly in the model.

603

604 Inflammasome assembly starts with the self-association of NLRP3 molecules, which, in the open and  
605 ATP-bound conformation, leads to the polymerisation of the NLRP3 PYD domains in a helical structure  
606 of about six PYD monomers per turn [27], implying that more than six NLRP3 molecules are needed to  
607 form a PYD filament. This initial PYD filament can then recruit ASC PYD domains to nucleate an ASC  
608 PYD filament [22]. The elongation is unidirectional, as ASC only elongates from the B-end of the NLRP3  
609 PYD helix [27]. Hence, these filaments have a polarity. Furthermore, the formation is irreversible, as  
610 they do not disassemble upon dilution [27]. The proximity of the ASC monomers allows the ASC CARD  
611 domains to associate and create platforms for caspase-1 CARD filaments, bringing the caspase domains  
612 into proximity for dimerization, trans-autocleavage, and activation [22]. The model implementation of  
613 NLRP3 inflammasome assembly is shown in Figure 8.

614

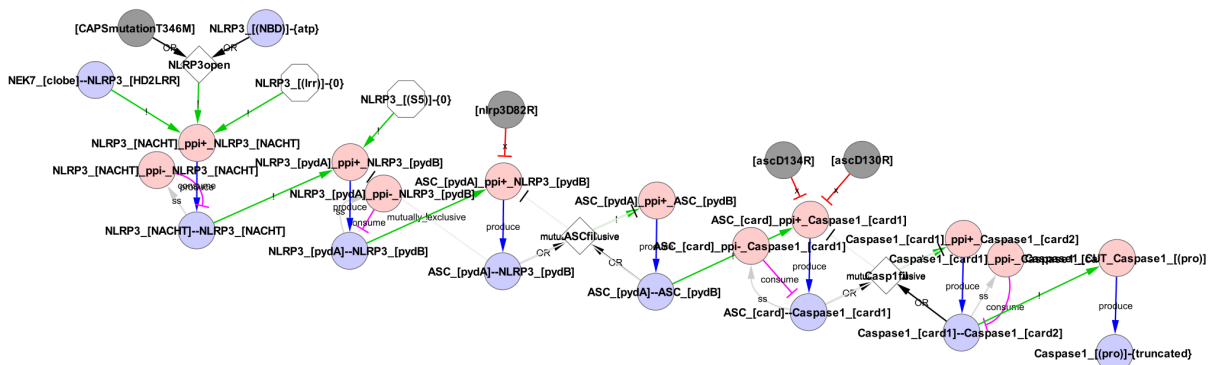

615

616 **Figure 8: Model of the NLRP3 inflammasome assembly.** The initial interaction between adjacent  
617 NLRP3s' NACHT domains requires an open conformation, NEK7 binding, and a lack of LRR  
618 ubiquitylation. The open conformation normally corresponds to the ATP-bound form, but is likely  
619 mimicked by certain CAPS mutations, such as R262W or T346M, allowing activation of NLRP3 after  
620 priming by LPS alone. The stable core NLRP3 interaction allow polymerisation of the NLRP3 PYD  
621 domains in the absence of Ser5 phosphorylation, which in turn nucleate the ASC PYD domain filament.  
622 ASC-ASC proximity provide the foundation for CARD filaments and nucleate caspase-1 polymerisation,  
623 which in turn allow caspase-1 cleavage and activation.

624

### 625 *NLRP3 inflammasome effectors and output*

626 The output of NLRP3 signalling is mediated by three effectors that are activated by caspase-1 through  
627 proteolytic cleavage: IL-1 $\beta$ , IL-18, and gasdermin D (Figure 9; reviewed in [158]). Pro-IL-1 $\beta$  and pro-IL-  
628 18 are cleaved into their active, signalling competent form. They are leaderless and released into the



629 extracellular space via exocytosis, plasma membrane pores, and/or cell rupture, to exercise a local or  
 630 systemic pro-inflammatory effect [159]. In contrast, gasdermin D exerts its effect locally: the N-  
 631 terminal peptide inserts in target membranes to form pores that are large enough to release IL-1 $\beta$  and  
 632 IL-18 [28, 160], and to allow uncontrolled ion fluxes, in a similarly manner as type I or type II triggers.  
 633 Of note, gasdermin D preferentially targets PI(4)P, PI(4,5)P<sub>2</sub>, and CL and also, but with apparently  
 634 weaker affinity, phosphatidic acid and phosphatidylserine [23]. The overlap in lipid affinity with NLRP3  
 635 is striking, and this, in combination with the reported localisation of gasdermin D to the NLRP3  
 636 inflammasome complex [65], suggests that gasdermin D might be directed to target the membranes  
 637 recruiting NLRP3. Hence, the NLRP3-gasdermin D axis could constitute an intracellular defence system  
 638 designed to kill and dispose of – through autophagy – intracellular pathogens. Consistently, gasdermin  
 639 D is cytotoxic and has the ability to kill bacteria [28]. It is also worth pointing out that gasdermin D  
 640 pores allow ion fluxes that lead to further inflammasome activation in a positive feedback loop, unless  
 641 both the original insult and signal are disposed of through autophagy. Consequently, caspase-4 and  
 642 caspase-5, which can activate gasdermin D in response to intracellular LPS, indirectly triggers NLRP3  
 643 activation through gasdermin D and the ion fluxes it causes [161] (Figure 10).

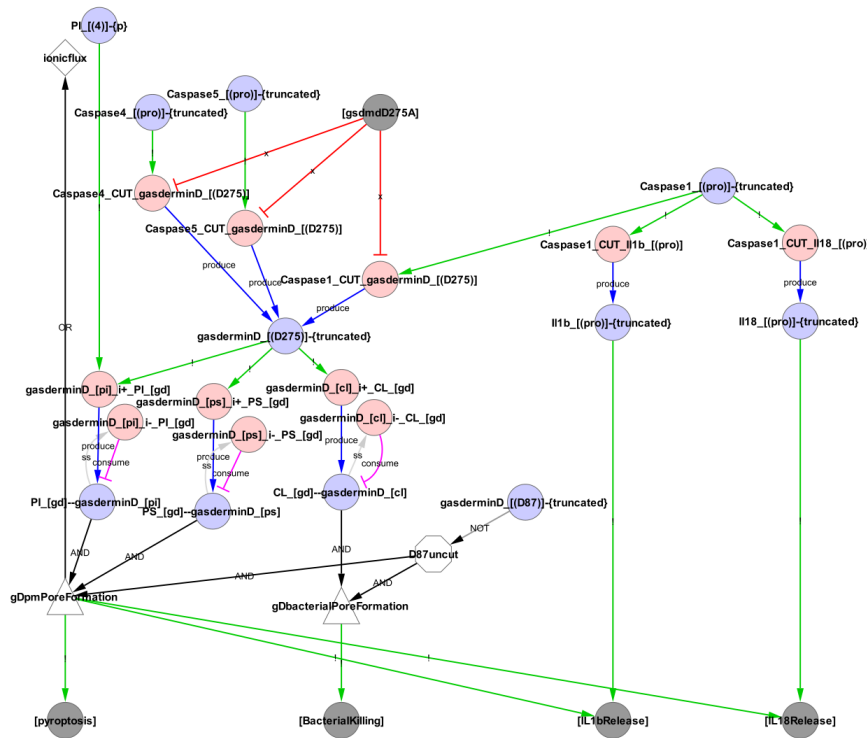

644

645 **Figure 9: A model of NLRP3 output.** Activated caspase-1 cleaves gasdermin D, pro-IL-1 $\beta$ , and pro-IL-  
 646 18. Gasdermin D insertion in bacterial membranes can directly kill bacteria. Insertion in internal  
 647 membranes may allow access to pathogens but may also kill the cell through pyroptosis. Cell lysis or  
 648 insertion of gasdermin D pores in the plasma membrane will enable the release of IL-1 $\beta$  and IL-18 to  
 649 the extracellular space. Formation of gasdermin D pores will allow ion flux that act as an NLRP3 trigger,  
 650 creating a positive feedback loop.

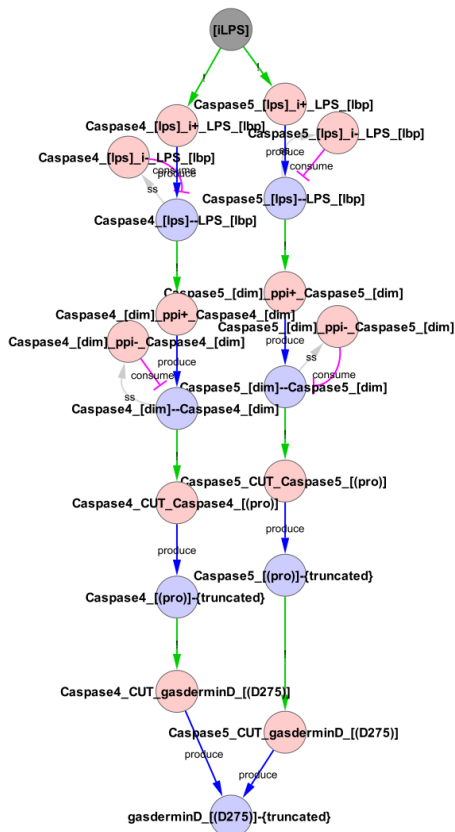

651

652 **Figure 10: Non-canonical NLRP3 activation.** Intracellular LPS can bind to and activate caspase-4 or  
653 caspase-5. LPS induces caspase dimerization, trans-autocleavage, and activation. Activated caspase-4  
654 or 5 cuts and activates gasdermin D, which inserts into the membrane causing ionic fluxes and hence  
655 constitutes a canonical NLRP3 trigger.

656

### 657 *NLRP3 turnover*

658 NLRP3 degradation seems to occur through both proteasomal and autophagosomal degradation, and  
659 to be controlled at several levels including through ubiquitylation (Figure 11). NLRP3 has also been  
660 reported to be targeted for precision autophagy in a ubiquitin independent manner via interaction  
661 with TRIM20 (pyrin) [24, 60]. As TRIM20 mutations are associated with familial Mediterranean fever  
662 [162], and as TRIM20 interacts with both ASC and NLRP3 [60] and links those to the autophagy  
663 machinery [24], it is tempting to speculate that TRIM20 recognises assembled inflammasome  
664 complexes to target them for autophagy in order to simultaneously remove the (perceived) threat and  
665 the danger signal. In the model, TRIM20 directed autophagy is implemented as dependent on the  
666 NLRP3-ASC interaction. Of note, the degradation of parasitophoric vacuoles have been shown to  
667 depend on ubiquitylation and interferon- $\gamma$  (IFN- $\gamma$ ) [55], and IFN- $\gamma$  has been shown to antagonise NLRP3  
668 inflammasome assembly and signalling [163], supporting a role of K63-linked polyubiquitylation as a  
669 switch between NLRP3 dependent signalling and autophagy. It should also be noted that NLRP3  
670 activates autophagy independently of ASC and caspase-1 [2], and the autophagosome targets  
671 ubiquitylated NLRP3 [74] – likely via SQSTM1 (p62) [2]. Autophagy constitutes a primitive example of  
672 innate immunity [164] (also called xenophagy [165]), and it is known to help clear intracellular  
673 pathogens [2]. Taken together, these findings suggests that NLRP3 is targeted for autophagy both  
674 before inflammasome assembly – through K63-linked polyubiquitylation – and after inflammasome  
675 assembly – through TRIM20-directed precision autophagy.

676

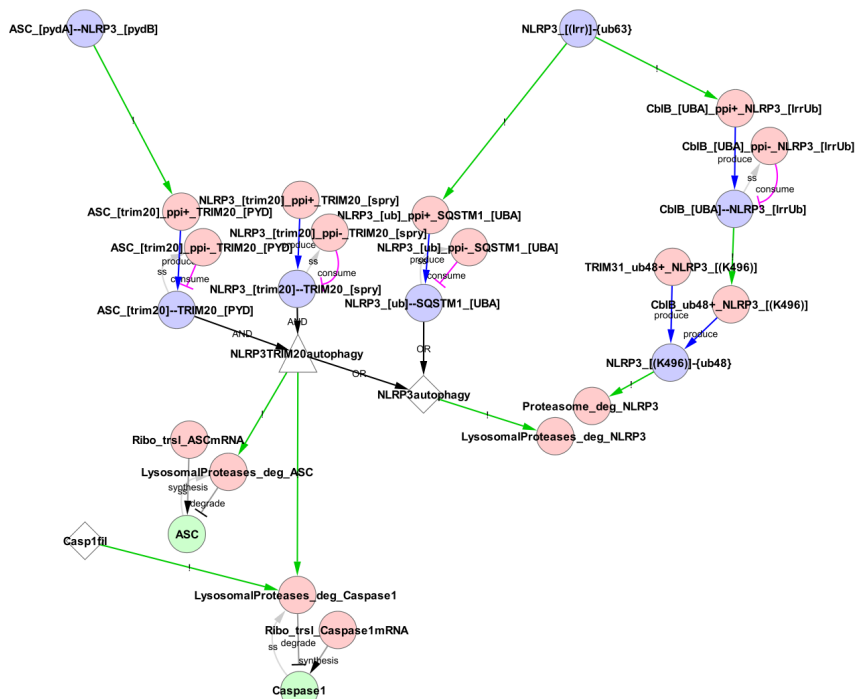

677

678 **Figure 11: Model of NLRP3 turnover.** NLRP3 is degraded both before (right) and after (left)  
679 inflammasome assembly. Proteasomal degradation depend on K48-linked ubiquitylation of Lys496,  
680 while K63-linked ubiquitin chains are recognised by the autophagy receptor SQSTM1 (p62). In the  
681 model, precision autophagy requires inflammasome assembly (interaction between NLRP3 and ASC),  
682 which allows simultaneous binding of TRIM20 (pyrin) to both NLRP3 and ASC, leading to  
683 autophagosomal degradation of both as well as of caspase-1 if it is part of the complex (Casp1fil).

684

#### 685 *A computational model explaining NLRP3 activation*

686 After completing the network reconstruction, we asked how well the network can explain the known  
687 behaviour of the NLRP3 inflammasome system. To answer this question, we generated the bipartite  
688 Boolean modelling corresponding to the network and analysed it through simulation (see methods).  
689 First, the model was simulated to its natural initial (off) state. Thereafter, we simulated the model from  
690 this natural initial state in the presence of LPS, nigericin, or LPS plus nigericin. As can be seen from  
691 Figure 12, NLRP3 fails to activate in response to LPS or nigericin *per se*, but does activate in response  
692 to LPS plus nigericin, as expected [53]. Similar results were obtained with Pam3csk4 and imiquimod,  
693 i.e., neither substance alone triggered NLRP3, but the combination of Pam3csk4 and imiquimod  
694 triggered NLRP3 activation, with the difference that K<sup>+</sup> efflux was a consequence of gasdermin D  
695 insertion rather than a trigger in this simulation, and hence occurred only at the end of the simulation.  
696 We also mimicked long term / strong LPS exposure by evaluating the effect of cytoplasmic LPS. Here,  
697 neither extracellular LPS alone, nor intracellular LPS alone was sufficient to activate NLRP3. However,  
698 the combination of intracellular LPS – which triggers non-canonical gasdermin D processing and hence  
699 ionic fluxes – and extracellular LPS – which provides a priming and licensing signal – activates NLRP3.  
700 Finally, the mitochondrial membrane permeabilisation (MMPT)-triggered cytoplasmic exposure of CL  
701 and NLRP3 activation occurred in the presence, but not the absence, of LPS priming. Taken together,  
702 the model reproduces basic NLRP3 activation.

703

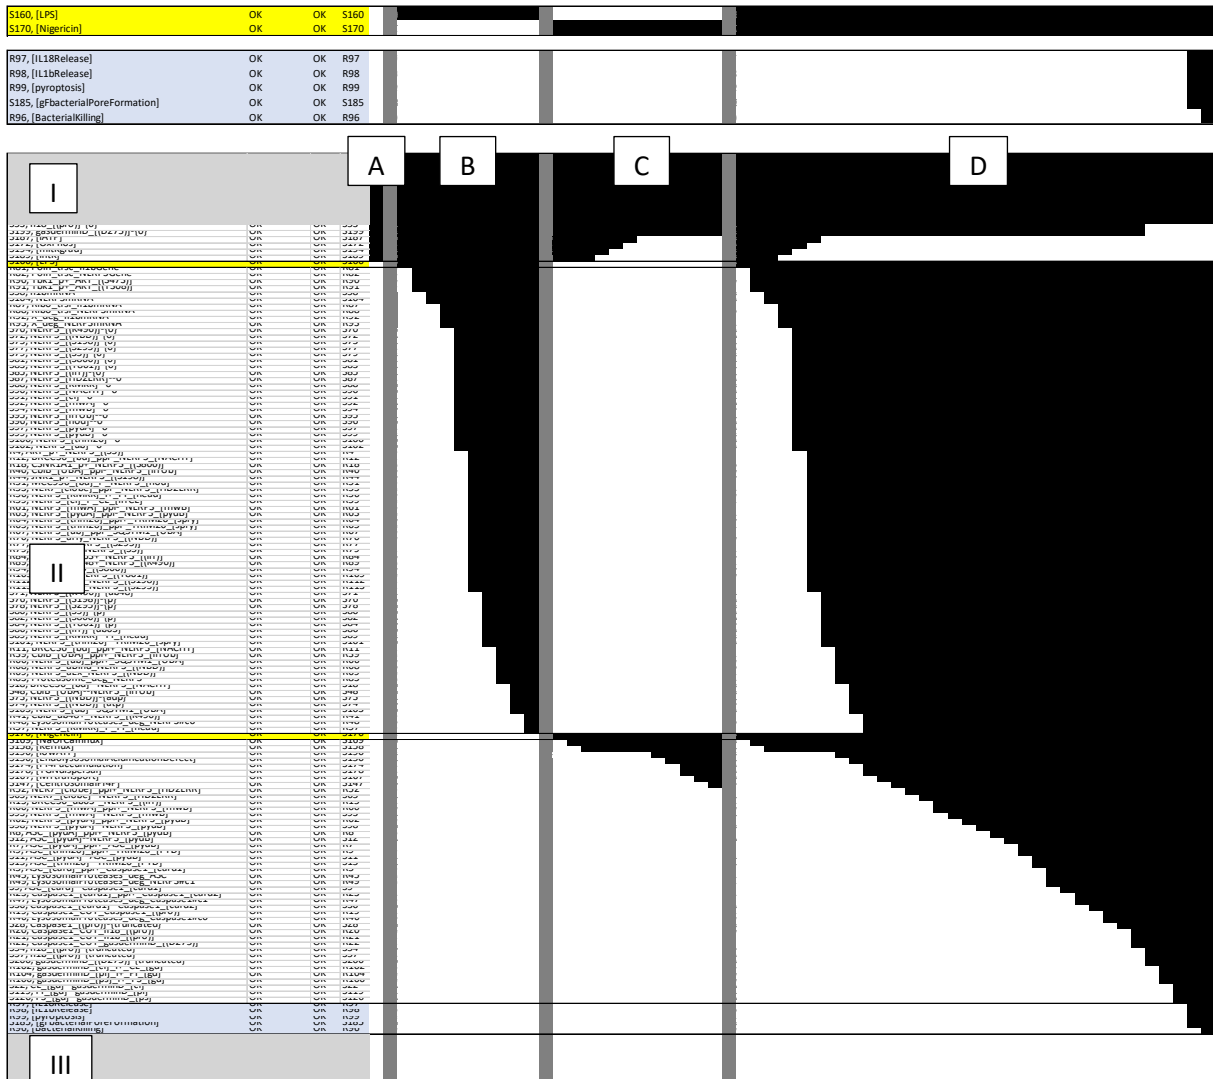

704

705 **Figure 12: Simulation of the network model.** The simulation is divided in four blocks: (A) is the natural  
 706 steady state in the absence of Signal 1 and 2, and other inputs, such as mutations or drugs. (B) is the  
 707 response to LPS alone, which results in priming (expression) and licensing of NLRP3, but not in  
 708 signalling. (C) is the response to nigericin alone, which triggers dispersal of phosphoinositol-4-  
 709 phosphate (PI(4)P)-positive vesicles but not activation of NLRP3 (which is absent, due to the lack of  
 710 priming). (D) is the response to LPS and nigericin, which leads to the activation of NLRP3, pyroptosis,  
 711 release of IL-1 $\beta$  and IL-18, and, if applicable, bacterial killing. Inputs are highlighted in yellow, and the  
 712 outputs are highlighted in blue, and both are shown enlarged at the top of the figure. The Y axis (rows)  
 713 correspond to different reactions and states, while the X-axis (columns) indicate the progression of  
 714 time within each time course (B-D). At each time point, each Boolean variable (row) is either True  
 715 (black) or False (white). The Boolean variables are divided into three blocks, where only block II is  
 716 changing in response to LPS and/or nigericin. Block I correspond to constitutively active reactions and  
 717 states, and block III corresponds to variables that never turn on (these correspond to other inputs and  
 718 drugs/mutations, and effects directly downstream of those).

719

720 Using the model, we evaluated the effect of inhibitors on NLRP3 activation. First, we tested MCC950,  
 721 which initially failed to prevent NLRP3 activation in response to nigericin and LPS. It turned out that  
 722 the binding of ATP to newly synthesised NLRP3 sufficed to bypass MCC950 inhibition. When MCC950

723 inhibit both ADP-to-ATP exchange and ATP binding to empty NLRP3, the activation is interrupted after  
724 NEK7 binding but before any downstream events, imposing a complete inhibition of NLRP3 activation.  
725 Second, we analysed the effect of BRCC36 inhibition by the general deubiquitinase inhibitor G5 [59].  
726 In the model, G5 completely inhibits deubiquitylation of NLRP3 LRR domain, but fail to prevent NLRP3  
727 activation due to priming dependent synthesis of new (unubiquitylated) NLRP3. Third, we analysed the  
728 effect of the PP2Aca inhibitor Okadaic Acid (OKA) [56]. In the model, OKA completely inhibits the  
729 dephosphorylation of NLRP3 at Ser5, but again the lack of dephosphorylation is offset by synthesis of  
730 new (unphosphorylated) NLRP3. If the bypass of G5 and OKA inhibition by protein synthesis is relevant  
731 *in vivo* remains unclear, but it demonstrates the limitation of negative licensing, and may help illustrate  
732 why overexpression of NLRP3 can make NLRP3 activation independent of Signal 1.

733

734 Furthermore, we implemented and tested two CAPS mutations and a truncated version of NLRP3  
735 lacking the LRR domain in the model. First, NLRP3 D305G is implemented as an inhibitor of PKA-  
736 mediated phosphorylation of Ser295. This mutation failed to activate NLRP3 alone or in combination  
737 with LPS in the simulations, suggesting that the clinical symptoms may be due to quantitative  
738 modulation of the ATP cycle that this qualitative model cannot capture. Second, in the model, the  
739 NLRP3 mutation T346M stabilises the open conformation, making activation of NLRP3 ATP-binding  
740 independent, effectively bypassing the need for PI(4)P binding to achieve the open structure in NLRP3  
741 in the model. This alone is not enough to activate NLRP3, not even in the presence of LPS. However,  
742 this is due to the model requirement of PI(4)P localisation to the centrosome, which should not be  
743 needed if NLRP3 activation is PI(4)P binding independent. If the model accounts for this, then NLRP3  
744 T346M is indeed activated upon priming with LPS alone. Finally, we tested the effect of deleting the  
745 complete LRR domain, mimicking the “miniNLRP3” experiments [36]. This is implemented by inhibiting  
746 all reactions involving exclusively the LRR domain (table 2). The truncated NLRP3 phenocopies the full  
747 length NLRP3 in the model for PI(4)P dependent activation, i.e., it does not respond to LPS or nigericin  
748 alone, but it is activated by LPS and nigericin together. However, miniNLRP3 failed to respond to MMPT  
749 and cytoplasmic CL exposure in the model, as NLRP3 binds CL via its LRR domain, suggesting that  
750 miniNLRP3 should not be activatable by the CL-axis *in vivo*.

751

| !UID:Contingency | !Target                        | !Contingency | !Modifier   |
|------------------|--------------------------------|--------------|-------------|
| 175              | RNF125_ub63+_NLRP3_{[lrr]}     | x            | [miniNLRP3] |
| 176              | BRCC36_ub63-_NLRP3_{[lrr]}     | x            | [miniNLRP3] |
| 177              | CblB_[UBA]_ppi_NLRP3_{[lrrUb]} | x            | [miniNLRP3] |
| 178              | uKin_P+_NLRP3_{[Y861]}         | x            | [miniNLRP3] |
| 179              | PTPN22_P-_NLRP3_{[Y861]}       | x            | [miniNLRP3] |
| 180              | CSNK1A1_P+_NLRP3_{[S806]}      | x            | [miniNLRP3] |
| 181              | X_P-_NLRP3_{[S806]}            | x            | [miniNLRP3] |
| 182              | NLRP3_{[cl]_i_CL_{[lrrCL]}     | x            | [miniNLRP3] |

752 **Table 2: Implementation of miniNLRP3.** MiniNLRP3 is a truncated form of NLRP3 completely lacking  
753 the LRR domain, and hence all reactions targeting this domain is unavailable. This is implemented as  
754 an input “[miniNLRP3]” that inhibits all reactions targeting this domain.

## 755 Discussion

756 The trigger signal for NLRP3 remains an open question. In this work, we have made the Ansatz that all  
757 NLRP3 trigger signals converge on one common cellular perturbation, and that this perturbation trigger  
758 NLRP3 activation – given that the priming and licensing conditions are fulfilled. We find that the  
759 evidence supports this, at least when it comes to the activation along the PI(4)P-NEK7 axis as all trigger  
760 signals lead to accumulation of mobile intracellular vesicles, that accumulate PI(4)P, and which  
761 therefore, at least in principle, can support NLRP3 activation. There are some key studies that support  
762 this notion. Most importantly, the PI(4)P binding region is sufficient to impose NLRP3-like regulation  
763 to all three types of stimuli to NLRP6, which normally does not respond to those stimuli [16]. This  
764 localises the Signal 2-sensing to this region, and PI(4)P binding is the only regulatory feature that has  
765 been mapped to this region, strongly suggesting that this is the critical regulatory input. Second, PI(4)P  
766 binding is in itself not enough [29], and NLRP3 release from its resting position on PI(4)P-containing  
767 Golgi membranes is necessary for activation [14], as is microtubule-based transport [124]. However,  
768 some membrane dispersing toxins (shown for monensin) do not result in NLRP3 activation [137],  
769 showing that also dispersal is insufficient for activation, suggesting that either PI(4)P accumulation or  
770 microtubule transport is regulated. At least the first is supported by previous data, as LMP has been  
771 found to trigger rapid recruitment of PI4K after lysosomal rupture/depolarisation [157]. This suggest  
772 that the common feature of NLRP3 regulation is most likely osmotic lysis and/or depolarisation of  
773 internal vesicles, which recruits PI4K and can be transported to the centrosome to create the  
774 conditions for NEK7 and PI(4)P-dependent activation of NLRP3.

775 Taking one step back, to the question how the diverse NLRP3 triggers cause osmotic lysis or  
776 depolarisation, we propose that the ability of the cell to maintain the ion gradient against leakage is  
777 critically disrupted by energy depletion (which directly affects the ion pumps) and/or membrane  
778 permeabilization. This would immediately result in a loss of osmotic integrity [149], and direct  
779 inhibition of both the plasma membrane ( $\text{Na}^+/\text{K}^+$ -ATPase; [154]) and vacuolar (V-ATPase; [146]) pumps  
780 have indeed been found to trigger NLRP3 activation after priming. The findings that hypo-osmolarity  
781 can trigger NLRP3 and hyper-osmolarity can suppress NLRP3 activation by other triggers [120] support  
782 this notion. However, there are also evidence for a completely different axis of NLRP3 activation by  
783 which NLRP3 can be activated by CL binding to the c-terminal LRR domain [64], which lies in the  
784 opposite end of the protein to the n-terminal PI(4)P binding domain. Moreover, CL has been shown to  
785 recruit caspase-8 [125], which is an essential component of the NEK7-independent NLRP3 activation  
786 [75]. CL in the cytoplasm could indicate a bacterial infection that should be directly targeted for  
787 destruction, suggesting that the normal time delay in inflammasome activation may be undesirable.  
788 Hence, it is possible that there is a CL-caspase-8 axis of NLRP3 activation that is fundamentally different  
789 – from structure of complex formation to regulation by post-translational modifications – than the  
790 PI(4)P-NEK7 axis of NLRP3 activation. By design or default, almost all the data we have encountered  
791 seem to have studied the latter, as a “mini-NLRP3” lacking the LRR domain than bind CL reproduces  
792 virtually all known regulation [36]. Hence, the potential CL-caspase-8 axis appears largely unexplored  
793 and its mechanistic architecture and relevance for NLRP3 activation in health and disease is therefore  
794 currently difficult to establish.

795 The network reconstruction process has highlighted the multiple roles of NLRP3: As a signalling  
796 platform, as an activator of autophagy, and as a mediator of direct bactericidal action. The overlap in  
797 lipid affinity between NLRP3 and gasdermin D is striking [23, 29, 64], and this, together with the report  
798 that gasdermin D is part of the NLRP3 inflammasome complex [65], suggests that the NLRP3  
799 inflammasome may catalyse the targeted insertion of bactericidal gasdermin D pores into the  
800 membrane on which it is activated [3, 28]. At the same time, NLRP3 can activate autophagy/xenophagy  
801 [164, 165] to help clear pathogens [2]. However, pathogens are also known to subvert intracellular



802 organelles to form replicative niches [166], e.g., by preventing phagosomal-lysosomal fusion [167],  
803 which suggests a potential overlap between such subverted compartments and the compartments  
804 where NLRP3 activation may occur. Hence, NLRP3 may be able to recognise intracellular pathogens  
805 both directly (through CL binding) and through perturbation of the membrane of intracellular  
806 compartments, coordinating a membrane attack or at least permeabilisation of the infected  
807 compartment with autophagic disposal and intercellular signalling through IL-1 $\beta$  and IL-18. With  
808 limited insult and successful clearance, a targeted insertion of gasdermin D should leave the cell able  
809 to recover. However, if insults are saturated, an extensive gasdermin D insertion may trigger the  
810 positive feedback loop through ion leakage, leading to irreversible NLRP3 activation. In fact, pyroptosis  
811 may well be an emergency response to unmanageable infection or damage, or an accidental side effect  
812 of a protective and essentially homeostatic process. Such a harmful outcome may explain the extensive  
813 licensing regulation of NLRP3, which appears to be only partially dependent on Signal 1, and which  
814 may serve to restrict NLRP3 activation to valid target compartments and to selectively exclude NLRP3  
815 activation and hence gasdermin D insertion from, e.g., the plasma membrane, where at least extensive  
816 insertion would likely be suicidal. However, if gasdermin D insertion in the plasma membrane is  
817 prevented, it leaves the question as to how IL-1 $\beta$  and IL-18 are released during physiological responses.  
818 Of note, it was found that NLRP3 activation triggers shedding of IL-1 $\beta$  and IL-18 containing exosomes  
819 [168], which are exported to the extracellular space where they may release their cytokines through  
820 gasdermin D pores or vesicular lysis without impacting cell integrity. It is tempting to speculate that  
821 the physiological NLRP3 response leads to targeted insertion of gasdermin D into specific vesicles, that  
822 are selectively loaded with locally processed IL-1 $\beta$  and IL-18, engulfed through autophagy and  
823 delivered to the extracellular space through exocytosis. In any case, NLRP3 has been shown to be a  
824 critical regulator of intracellular defence and intercellular signalling.

825 The model presented here is essentially a model of PI(4)P-NEK7 dependent activation of NLRP3, and  
826 even this is merely a snapshot based on the currently available data and knowledge. Moreover, it was  
827 not possible to cover even the already available literature in the field, as a search for “NLRP3” alone  
828 on PubMed yields more than 15,000 hits. This highlights the need to build a formal reusable knowledge  
829 base that the community can use, update, and expand as the field progresses. It is important that such  
830 a knowledge base is highly composable - i.e., allows statements to be added, edited, or removed  
831 individually, and arbitrary parts to be extracted and/or combined for analysis – to allow the distributed  
832 work necessary for sustainable community efforts and to make it useful for a wide range of projects.  
833 To this end, the mechanistic knowledge of the NLRP3 system is broken down into minimal statements  
834 – elemental reactions and contingencies – which are defined in terms of site-specific elemental states.  
835 The advantage of this approach is that the knowledge of individual reactions can be formulated  
836 independently, including both the effect (the elemental reaction) and the regulation (the  
837 contingencies), so that these statements can be individually evaluated, modified, and added or  
838 removed. However, it also requires this information to be available in the literature, i.e., that the effect  
839 of specific modifications on a specific reaction has been examined directly, which is not always the  
840 case. Here, we use targeted literature searches to establish such a mechanistic network for the core  
841 NLRP3 regulation including some, but not all, reported modification sites and interaction partners, as  
842 we have been unable to find sufficient mechanistic data for several of the components and  
843 modifications suggested in the literature to be of importance for NLRP3 regulation. We focussed on  
844 generating a consistent model that could explain NLRP3 activation from the existing data, rather than  
845 on highlighting inconsistencies, meaning that there are a number of assumptions present in the model.  
846 At this level, the network is effectively a formal and highly reusable literature review, with the added  
847 feature that all statements must be precise and internally consistent, and this curation and  
848 formalisation process is indeed the most challenging part of building a network model. However, once

849 this knowledge base (consisting of elemental reactions and contingencies) is compiled, it enables  
850 visualisation and computational analysis of (selected parts of) the complete knowledge base. Here, we  
851 make use of the rxncon regulatory graph to visualise the causal information flow through the network,  
852 to make the regulatory structure of the network accessible to readers. Moreover, the biological  
853 knowledge base can be automatically converted into a bipartite Boolean model (bBM). The limitation  
854 of the bBM is that it can only make qualitative predictions (yes/no, active/inactive), without quantities  
855 and meaningful time resolution. With that said, it is uniquely defined by the biological knowledge base,  
856 does not need parametrisation or model optimisation, and can hence be used to directly evaluate the  
857 knowledge base. Here, we use it to evaluate if the assembled knowledge suffices to explain the known  
858 system regulation (does it respond to the given input(s)?), and if it can predict the effect of inhibitors  
859 and mutations (how is the response altered by a given combination of inhibitors and/or mutations?).  
860 The network does indeed suffice to explain NLRP3 activation to a range of inputs, although the effect  
861 of inhibitors and mutations are sometimes less clear to evaluate with the bBM. The simulation results  
862 suggests that, given significant *de novo* synthesis of NLRP3, the negative licensing may be ineffectual.  
863 However, it is also clear that this modelling scheme cannot explain quantitative effects, and the  
864 importance of quantitative effects may be a general feature in NLRP3 activation, including at the level  
865 of synthesis, spatiotemporal restriction, and regulation by autophagic degradation. Despite these  
866 limitations, the knowledge base of molecular mechanisms presented here is an internally consistent  
867 knowledge base that contain the mechanisms that are necessary and sufficient to explain the  
868 qualitative behaviour of the core NLRP3 network, which can be processed and analysed  
869 computationally, and which can easily be adapted and extended by the community as new data and  
870 knowledge become available.

871 *Acknowledgements*

872 We would like to thank Dr. Alexander Persson for many useful discussions on the NLRP3 inflammasome  
873 and to acknowledge scientific support from the Exploring Inflammation in Health and Disease (X-HiDE)  
874 Consortium, which is a strategic research profile at Örebro University funded by the Knowledge  
875 Foundation (20200017).

876 References

- 877 1. Martinon, F., K. Burns, and J. Tschopp, *The inflammasome: a molecular platform triggering*  
878 *activation of inflammatory caspases and processing of proIL-beta*. Mol Cell, 2002. **10**(2): p. 417-  
879 26.
- 880 2. Shi, C.S., et al., *Activation of autophagy by inflammatory signals limits IL-1beta production by*  
881 *targeting ubiquitinated inflammasomes for destruction*. Nat Immunol, 2012. **13**(3): p. 255-63.
- 882 3. Wang, J., K. Deobald, and F. Re, *Gasdermin D Protects from Melioidosis through Pyroptosis and*  
883 *Direct Killing of Bacteria*. J Immunol, 2019. **202**(12): p. 3468-3473.
- 884 4. Fink, S.L. and B.T. Cookson, *Caspase-1-dependent pore formation during pyroptosis leads to*  
885 *osmotic lysis of infected host macrophages*. Cell Microbiol, 2006. **8**(11): p. 1812-25.
- 886 5. Seok, J.K., et al., *Regulation of the NLRP3 Inflammasome by Post-Translational Modifications*  
887 *and Small Molecules*. Front Immunol, 2020. **11**: p. 618231.
- 888 6. Kelley, N., et al., *The NLRP3 Inflammasome: An Overview of Mechanisms of Activation and*  
889 *Regulation*. Int J Mol Sci, 2019. **20**(13).
- 890 7. Romers, J., et al., *Using rxncon to Develop Rule-Based Models*, in *Modeling Biomolecular Site*  
891 *Dynamics: Methods and Protocols*, W.S. Hlavacek, Editor. 2019, Springer New York: New York,  
892 NY. p. 71-118.
- 893 8. Tiger, C.F., et al., *A framework for mapping, visualisation and automatic model creation of*  
894 *signal-transduction networks*. Mol Syst Biol, 2012. **8**: p. 578.
- 895 9. Romers, J.C. and M. Krantz, *Pre-print: rxncon 2.0: a language for executable molecular systems*  
896 *biology*. bioRxiv, 2017.
- 897 10. Faeder, J.R., M.L. Blinov, and W.S. Hlavacek, *Rule-based modeling of biochemical systems with*  
898 *BioNetGen*. Methods Mol Biol, 2009. **500**: p. 113-67.
- 899 11. Romers, J., et al., *A scalable method for parameter-free simulation and validation of*  
900 *mechanistic cellular signal transduction network models*. npj Systems Biology and Applications,  
901 2020. **6**(1): p. 2.
- 902 12. Lubitz, T., et al., *Network reconstruction and validation of the Snf1/AMPK pathway in baker's*  
903 *yeast based on a comprehensive literature review*. Npj Systems Biology And Applications, 2015.  
904 **1**: p. 15007.
- 905 13. Münzner, U., E. Klipp, and M. Krantz, *A comprehensive, mechanistically detailed, and*  
906 *executable model of the cell division cycle in Saccharomyces cerevisiae*. Nature  
907 Communications, 2019. **10**(1): p. 1308.
- 908 14. Zhang, Z., et al., *Protein kinase D at the Golgi controls NLRP3 inflammasome activation*. J Exp  
909 Med, 2017. **214**(9): p. 2671-2693.
- 910 15. Yaron, J.R., et al., *K(+) regulates Ca(2+) to drive inflammasome signaling: dynamic visualization*  
911 *of ion flux in live cells*. Cell Death Dis, 2015. **6**(10): p. e1954.
- 912 16. Tapia-Abellan, A., et al., *Sensing low intracellular potassium by NLRP3 results in a stable open*  
913 *structure that promotes inflammasome activation*. Sci Adv, 2021. **7**(38): p. eabf4468.
- 914 17. Song, N., et al., *NLRP3 Phosphorylation Is an Essential Priming Event for Inflammasome*  
915 *Activation*. Mol Cell, 2017. **68**(1): p. 185-197 e6.
- 916 18. Siess, K.M. and T.A. Leonard, *Lipid-dependent Akt-ivity: where, when, and how*. Biochem Soc  
917 Trans, 2019. **47**(3): p. 897-908.
- 918 19. Sharif, H., et al., *Structural mechanism for NEK7-licensed activation of NLRP3 inflammasome*.  
919 Nature, 2019. **570**(7761): p. 338-343.
- 920 20. Niu, T., et al., *NLRP3 phosphorylation in its LRR domain critically regulates inflammasome*  
921 *assembly*. Nat Commun, 2021. **12**(1): p. 5862.
- 922 21. Mortimer, L., et al., *NLRP3 inflammasome inhibition is disrupted in a group of auto-*  
923 *inflammatory disease CAPS mutations*. Nat Immunol, 2016. **17**(10): p. 1176-86.
- 924 22. Lu, A., et al., *Unified polymerization mechanism for the assembly of ASC-dependent*  
925 *inflammasomes*. Cell, 2014. **156**(6): p. 1193-1206.

- 926 23. Liu, X., et al., *Inflammasome-activated gasdermin D causes pyroptosis by forming membrane*  
927 *pores*. *Nature*, 2016. **535**(7610): p. 153-8.
- 928 24. Kimura, T., et al., *TRIM-mediated precision autophagy targets cytoplasmic regulators of innate*  
929 *immunity*. *J Cell Biol*, 2015. **210**(6): p. 973-89.
- 930 25. Hulse, J. and K. Bhaskar, *Crosstalk Between the NLRP3 Inflammasome/ASC Speck and Amyloid*  
931 *Protein Aggregates Drives Disease Progression in Alzheimer's and Parkinson's Disease*. *Front*  
932 *Mol Neurosci*, 2022. **15**: p. 805169.
- 933 26. Huang, Y., W. Xu, and R. Zhou, *NLRP3 inflammasome activation and cell death*. *Cell Mol*  
934 *Immunol*, 2021. **18**(9): p. 2114-2127.
- 935 27. Hochheiser, I.V., et al., *Directionality of PYD filament growth determined by the transition of*  
936 *NLRP3 nucleation seeds to ASC elongation*. *Sci Adv*, 2022. **8**(19): p. eabn7583.
- 937 28. Ding, J., et al., *Pore-forming activity and structural autoinhibition of the gasdermin family*.  
938 *Nature*, 2016. **535**(7610): p. 111-6.
- 939 29. Chen, J. and Z.J. Chen, *PtdIns4P on dispersed trans-Golgi network mediates NLRP3*  
940 *inflammasome activation*. *Nature*, 2018. **564**(7734): p. 71-76.
- 941 30. Ziglari, T., Z. Wang, and A. Holian, *Contribution of Particle-Induced Lysosomal Membrane*  
942 *Hyperpolarization to Lysosomal Membrane Permeabilization*. *Int J Mol Sci*, 2021. **22**(5).
- 943 31. Zhao, X., et al., *Membrane targeting of TIRAP is negatively regulated by phosphorylation in its*  
944 *phosphoinositide-binding motif*. *Sci Rep*, 2017. **7**: p. 43043.
- 945 32. Zhang, Z., et al., *Distinct changes in endosomal composition promote NLRP3 inflammasome*  
946 *activation*. *Nat Immunol*, 2023. **24**(1): p. 30-41.
- 947 33. Wu, D., et al., *Inflammasome Meets Centrosome: Understanding the Emerging Role of*  
948 *Centrosome in Controlling Inflammasome Activation*. *Front Immunol*, 2022. **13**: p. 826106.
- 949 34. Kosmidis, E., et al., *Regulation of the mammalian-brain V-ATPase through ultraslow mode-*  
950 *switching*. *Nature*, 2022. **611**(7937): p. 827-834.
- 951 35. Juhaszova, M., et al., *ATP Synthase K(+)- and H(+)-Fluxes Drive ATP Synthesis and Enable*  
952 *Mitochondrial K(+)-"Uniporter" Function: I. Characterization of Ion Fluxes*. *Function (Oxf)*,  
953 2022. **3**(2): p. zqab065.
- 954 36. Hafner-Bratkovic, I., et al., *NLRP3 lacking the leucine-rich repeat domain can be fully activated*  
955 *via the canonical inflammasome pathway*. *Nat Commun*, 2018. **9**(1): p. 5182.
- 956 37. Gross, C.J., et al., *K(+) Efflux-Independent NLRP3 Inflammasome Activation by Small Molecules*  
957 *Targeting Mitochondria*. *Immunity*, 2016. **45**(4): p. 761-773.
- 958 38. Di, A., et al., *The TWIK2 Potassium Efflux Channel in Macrophages Mediates NLRP3*  
959 *Inflammasome-Induced Inflammation*. *Immunity*, 2018. **49**(1): p. 56-65 e4.
- 960 39. Baker, P.J., et al., *Posttranslational Modification as a Critical Determinant of Cytoplasmic*  
961 *Innate Immune Recognition*. *Physiol Rev*, 2017. **97**(3): p. 1165-1209.
- 962 40. Zhao, W., et al., *AKT Regulates NLRP3 Inflammasome Activation by Phosphorylating NLRP3*  
963 *Serine 5*. *J Immunol*, 2020. **205**(8): p. 2255-2264.
- 964 41. Zhang, D., et al., *Degradation of NLRP3 by p62-dependent-autophagy improves cognitive*  
965 *function in Alzheimer's disease by maintaining the phagocytic function of microglia*. *CNS*  
966 *Neurosci Ther*, 2023.
- 967 42. Xiao, L., V.G. Magupalli, and H. Wu, *Cryo-EM structures of the active NLRP3 inflammasome*  
968 *disc*. *Nature*, 2023. **613**(7944): p. 595-600.
- 969 43. Tang, J., et al., *Sequential ubiquitination of NLRP3 by RNF125 and Cbl-b limits inflammasome*  
970 *activation and endotoxemia*. *J Exp Med*, 2020. **217**(4).
- 971 44. Shen, Y.H. and J.I. Abe, *Enigma of Inflammasome Activation by Kinases*. *Arterioscler Thromb*  
972 *Vasc Biol*, 2019. **39**(8): p. 1501-1503.
- 973 45. Reinhardt, R., et al., *It Takes Two to Tango: Activation of Protein Kinase D by Dimerization*.  
974 *Bioessays*, 2020. **42**(4): p. e1900222.
- 975 46. Ou, Y.H., et al., *TBK1 directly engages Akt/PKB survival signaling to support oncogenic*  
976 *transformation*. *Mol Cell*, 2011. **41**(4): p. 458-70.



- 977 47. Osellame, L.D., T.S. Blacker, and M.R. Duchon, *Cellular and molecular mechanisms of*  
978 *mitochondrial function*. Best Pract Res Clin Endocrinol Metab, 2012. **26**(6): p. 711-23.
- 979 48. Nolin, F., et al., *Changes to cellular water and element content induced by nucleolar stress:*  
980 *investigation by a cryo-correlative nano-imaging approach*. Cell Mol Life Sci, 2013. **70**(13): p.  
981 2383-94.
- 982 49. Nanda, S.K., et al., *IKKbeta is required for the formation of the NLRP3 inflammasome*. EMBO  
983 Rep, 2021. **22**(10): p. e50743.
- 984 50. Lamkanfi, M. and T.D. Kanneganti, *Nlrp3: an immune sensor of cellular stress and infection*. Int  
985 J Biochem Cell Biol, 2010. **42**(6): p. 792-5.
- 986 51. Kopp, R., et al., *P2X7 Interactions and Signaling - Making Head or Tail of It*. Front Mol Neurosci,  
987 2019. **12**: p. 183.
- 988 52. Garlid, K.D. and P. Paucek, *Mitochondrial potassium transport: the K(+) cycle*. Biochim Biophys  
989 Acta, 2003. **1606**(1-3): p. 23-41.
- 990 53. Fischer, F.A., et al., *TBK1 and IKKepsilon act like an OFF switch to limit NLRP3 inflammasome*  
991 *pathway activation*. Proc Natl Acad Sci U S A, 2021. **118**(38).
- 992 54. Fischer, F.A., K.W. Chen, and J.S. Bezbradica, *Posttranslational and Therapeutic Control of*  
993 *Gasdermin-Mediated Pyroptosis and Inflammation*. Front Immunol, 2021. **12**: p. 661162.
- 994 55. Dosa, A. and T. Csizmadia, *The role of K63-linked polyubiquitin in several types of autophagy*.  
995 Biol Futur, 2022. **73**(2): p. 137-148.
- 996 56. Stutz, A., et al., *NLRP3 inflammasome assembly is regulated by phosphorylation of the pyrin*  
997 *domain*. J Exp Med, 2017. **214**(6): p. 1725-1736.
- 998 57. Spalinger, M.R., et al., *NLRP3 tyrosine phosphorylation is controlled by protein tyrosine*  
999 *phosphatase PTPN22*. J Clin Invest, 2016. **126**(5): p. 1783-800.
- 1000 58. Shi, H., et al., *NLRP3 activation and mitosis are mutually exclusive events coordinated by NEK7,*  
1001 *a new inflammasome component*. Nat Immunol, 2016. **17**(3): p. 250-8.
- 1002 59. Py, B.F., et al., *Deubiquitination of NLRP3 by BRCC3 critically regulates inflammasome activity*.  
1003 Mol Cell, 2013. **49**(2): p. 331-8.
- 1004 60. Papin, S., et al., *The SPRY domain of Pyrin, mutated in familial Mediterranean fever patients,*  
1005 *interacts with inflammasome components and inhibits proIL-1beta processing*. Cell Death  
1006 Differ, 2007. **14**(8): p. 1457-66.
- 1007 61. Nambayan, R.J.T., et al., *The inflammasome adapter ASC assembles into filaments with integral*  
1008 *participation of its two Death Domains, PYD and CARD*. J Biol Chem, 2019. **294**(2): p. 439-452.
- 1009 62. Katsnelson, M.A., et al., *K+ efflux agonists induce NLRP3 inflammasome activation*  
1010 *independently of Ca2+ signaling*. J Immunol, 2015. **194**(8): p. 3937-52.
- 1011 63. Jia, R. and J.S. Bonifacino, *Lysosome Positioning Influences mTORC2 and AKT Signaling*. Mol  
1012 Cell, 2019. **75**(1): p. 26-38 e3.
- 1013 64. Iyer, S.S., et al., *Mitochondrial cardiolipin is required for Nlrp3 inflammasome activation*.  
1014 Immunity, 2013. **39**(2): p. 311-323.
- 1015 65. He, W.T., et al., *Gasdermin D is an executor of pyroptosis and required for interleukin-1beta*  
1016 *secretion*. Cell Res, 2015. **25**(12): p. 1285-98.
- 1017 66. Duncan, J.A., et al., *Cryopyrin/NALP3 binds ATP/dATP, is an ATPase, and requires ATP binding*  
1018 *to mediate inflammatory signaling*. Proc Natl Acad Sci U S A, 2007. **104**(19): p. 8041-6.
- 1019 67. Dick, M.S., et al., *ASC filament formation serves as a signal amplification mechanism for*  
1020 *inflammasomes*. Nat Commun, 2016. **7**: p. 11929.
- 1021 68. Coll, R.C., et al., *MCC950 directly targets the NLRP3 ATP-hydrolysis motif for inflammasome*  
1022 *inhibition*. Nat Chem Biol, 2019. **15**(6): p. 556-559.
- 1023 69. Rother, M., et al., *Information content and scalability in signal transduction network*  
1024 *reconstruction formats*. Mol Biosyst, 2013. **9**(8): p. 1993-2004.
- 1025 70. Le Novere, N., et al., *The Systems Biology Graphical Notation*. Nat Biotechnol, 2009. **27**(8): p.  
1026 735-41.
- 1027 71. Hlavacek, W.S., et al., *The complexity of complexes in signal transduction*. Biotechnol Bioeng,  
1028 2003. **84**(7): p. 783-94.



- 1029 72. Zhou, R., et al., *Thioredoxin-interacting protein links oxidative stress to inflammasome*  
1030 *activation*. Nat Immunol, 2010. **11**(2): p. 136-40.
- 1031 73. Lunov, O., et al., *Amino-functionalized polystyrene nanoparticles activate the NLRP3*  
1032 *inflammasome in human macrophages*. ACS Nano, 2011. **5**(12): p. 9648-57.
- 1033 74. Campden, R.I. and Y. Zhang, *The role of lysosomal cysteine cathepsins in NLRP3 inflammasome*  
1034 *activation*. Arch Biochem Biophys, 2019. **670**: p. 32-42.
- 1035 75. Schmacke, N.A., et al., *IKKbeta primes inflammasome formation by recruiting NLRP3 to the*  
1036 *trans-Golgi network*. Immunity, 2022. **55**(12): p. 2271-2284 e7.
- 1037 76. Bauernfeind, F.G., et al., *Cutting edge: NF-kappaB activating pattern recognition and cytokine*  
1038 *receptors license NLRP3 inflammasome activation by regulating NLRP3 expression*. J Immunol,  
1039 2009. **183**(2): p. 787-91.
- 1040 77. Gritsenko, A., et al., *Priming Is Dispensable for NLRP3 Inflammasome Activation in Human*  
1041 *Monocytes In Vitro*. Front Immunol, 2020. **11**: p. 565924.
- 1042 78. Karasawa, T., et al., *Cryo-sensitive aggregation triggers NLRP3 inflammasome assembly in*  
1043 *cryopyrin-associated periodic syndrome*. Elife, 2022. **11**.
- 1044 79. Ohto, U., et al., *Structural basis for the oligomerization-mediated regulation of NLRP3*  
1045 *inflammasome activation*. Proc Natl Acad Sci U S A, 2022. **119**(11): p. e2121353119.
- 1046 80. McCoy, A.J., et al., *Cytotoxins of the human pathogen Aeromonas hydrophila trigger, via the*  
1047 *NLRP3 inflammasome, caspase-1 activation in macrophages*. Eur J Immunol, 2010. **40**(10): p.  
1048 2797-803.
- 1049 81. Mariathasan, S., et al., *Cryopyrin activates the inflammasome in response to toxins and ATP*.  
1050 Nature, 2006. **440**(7081): p. 228-32.
- 1051 82. Babelova, A., et al., *Biglycan, a danger signal that activates the NLRP3 inflammasome via toll-*  
1052 *like and P2X receptors*. J Biol Chem, 2009. **284**(36): p. 24035-48.
- 1053 83. Basso, P., et al., *Multiple Pseudomonas species secrete exolysin-like toxins and provoke*  
1054 *Caspase-1-dependent macrophage death*. Environ Microbiol, 2017. **19**(10): p. 4045-4064.
- 1055 84. Fox, D., et al., *Bacillus cereus non-haemolytic enterotoxin activates the NLRP3 inflammasome*.  
1056 Nat Commun, 2020. **11**(1): p. 760.
- 1057 85. Mathur, A., et al., *A multicomponent toxin from Bacillus cereus incites inflammation and*  
1058 *shapes host outcome via the NLRP3 inflammasome*. Nat Microbiol, 2019. **4**(2): p. 362-374.
- 1059 86. Costa, A., et al., *Activation of the NLRP3 inflammasome by group B streptococci*. J Immunol,  
1060 2012. **188**(4): p. 1953-60.
- 1061 87. McNeela, E.A., et al., *Pneumolysin activates the NLRP3 inflammasome and promotes*  
1062 *proinflammatory cytokines independently of TLR4*. PLoS Pathog, 2010. **6**(11): p. e1001191.
- 1063 88. Valderrama, J.A., et al., *Group A streptococcal M protein activates the NLRP3 inflammasome*.  
1064 Nat Microbiol, 2017. **2**(10): p. 1425-1434.
- 1065 89. Demirel, I., et al., *Activation of the NLRP3 Inflammasome Pathway by Uropathogenic*  
1066 *Escherichia coli Is Virulence Factor-Dependent and Influences Colonization of Bladder Epithelial*  
1067 *Cells*. Front Cell Infect Microbiol, 2018. **8**: p. 81.
- 1068 90. Verma, V., et al., *alpha-Hemolysin of uropathogenic E. coli regulates NLRP3 inflammasome*  
1069 *activation and mitochondrial dysfunction in THP-1 macrophages*. Sci Rep, 2020. **10**(1): p.  
1070 12653.
- 1071 91. Cheng, Y.L., et al., *Effect of enterohaemorrhagic Escherichia coli O157:H7-specific*  
1072 *enterohaemolysin on interleukin-1beta production differs between human and mouse*  
1073 *macrophages due to the different sensitivity of NLRP3 activation*. Immunology, 2015. **145**(2):  
1074 p. 258-67.
- 1075 92. Craven, R.R., et al., *Staphylococcus aureus alpha-hemolysin activates the NLRP3-*  
1076 *inflammasome in human and mouse monocytic cells*. PLoS One, 2009. **4**(10): p. e7446.
- 1077 93. Holzinger, D., et al., *Staphylococcus aureus Panton-Valentine leukocidin induces an*  
1078 *inflammatory response in human phagocytes via the NLRP3 inflammasome*. J Leukoc Biol,  
1079 2012. **92**(5): p. 1069-81.

- 1080 94. Melehani, J.H., et al., *Staphylococcus aureus* Leukocidin A/B (LukAB) Kills Human Monocytes  
1081 via Host NLRP3 and ASC when Extracellular, but Not Intracellular. PLoS Pathog, 2015. **11**(6): p.  
1082 e1004970.
- 1083 95. Munoz-Planillo, R., et al., A critical role for hemolysins and bacterial lipoproteins in  
1084 *Staphylococcus aureus*-induced activation of the Nlrp3 inflammasome. J Immunol, 2009.  
1085 **183**(6): p. 3942-8.
- 1086 96. Song, L., et al., A critical role for hemolysin in *Vibrio fluvialis*-induced IL-1beta secretion  
1087 mediated by the NLRP3 inflammasome in macrophages. Front Microbiol, 2015. **6**: p. 510.
- 1088 97. Toma, C., et al., Pathogenic *Vibrio* activate NLRP3 inflammasome via cytotoxins and  
1089 TLR/nucleotide-binding oligomerization domain-mediated NF-kappa B signaling. J Immunol,  
1090 2010. **184**(9): p. 5287-97.
- 1091 98. Meixenberger, K., et al., *Listeria monocytogenes*-infected human peripheral blood  
1092 mononuclear cells produce IL-1beta, depending on listeriolysin O and NLRP3. J Immunol, 2010.  
1093 **184**(2): p. 922-30.
- 1094 99. Bueter, C.L., et al., Chitosan but not chitin activates the inflammasome by a mechanism  
1095 dependent upon phagocytosis. J Biol Chem, 2011. **286**(41): p. 35447-35455.
- 1096 100. Cullen, S.P., et al., Diverse Activators of the NLRP3 Inflammasome Promote IL-1beta Secretion  
1097 by Triggering Necrosis. Cell Rep, 2015. **11**(10): p. 1535-48.
- 1098 101. Chu, J., et al., Cholesterol-dependent cytolysins induce rapid release of mature IL-1beta from  
1099 murine macrophages in a NLRP3 inflammasome and cathepsin B-dependent manner. J Leukoc  
1100 Biol, 2009. **86**(5): p. 1227-38.
- 1101 102. Yamamura, K., et al., Inflammasome Activation Induced by Perfringolysin O of *Clostridium*  
1102 *perfringens* and Its Involvement in the Progression of Gas Gangrene. Front Microbiol, 2019. **10**:  
1103 p. 2406.
- 1104 103. Niemi, K., et al., Serum amyloid A activates the NLRP3 inflammasome via P2X7 receptor and a  
1105 cathepsin B-sensitive pathway. J Immunol, 2011. **186**(11): p. 6119-28.
- 1106 104. Song, L., et al., Activation of the Nlrp3 Inflammasome Contributes to Shiga Toxin-Induced  
1107 Hemolytic Uremic Syndrome in a Mouse Model. Front Immunol, 2020. **11**: p. 619096.
- 1108 105. Hornung, V., et al., Silica crystals and aluminum salts activate the NALP3 inflammasome  
1109 through phagosomal destabilization. Nat Immunol, 2008. **9**(8): p. 847-56.
- 1110 106. Munoz-Planillo, R., et al., K(+) efflux is the common trigger of NLRP3 inflammasome activation  
1111 by bacterial toxins and particulate matter. Immunity, 2013. **38**(6): p. 1142-53.
- 1112 107. Halle, A., et al., The NALP3 inflammasome is involved in the innate immune response to  
1113 amyloid-beta. Nat Immunol, 2008. **9**(8): p. 857-65.
- 1114 108. Dostert, C., et al., Innate immune activation through Nalp3 inflammasome sensing of asbestos  
1115 and silica. Science, 2008. **320**(5876): p. 674-7.
- 1116 109. Martinon, F., et al., Gout-associated uric acid crystals activate the NALP3 inflammasome.  
1117 Nature, 2006. **440**(7081): p. 237-41.
- 1118 110. Meunier, E., et al., Double-walled carbon nanotubes trigger IL-1beta release in human  
1119 monocytes through Nlrp3 inflammasome activation. Nanomedicine, 2012. **8**(6): p. 987-95.
- 1120 111. Palomaki, J., et al., Long, needle-like carbon nanotubes and asbestos activate the NLRP3  
1121 inflammasome through a similar mechanism. ACS Nano, 2011. **5**(9): p. 6861-70.
- 1122 112. Bueter, C.L., et al., Spectrum and mechanisms of inflammasome activation by chitosan. J  
1123 Immunol, 2014. **192**(12): p. 5943-51.
- 1124 113. Duewell, P., et al., NLRP3 inflammasomes are required for atherogenesis and activated by  
1125 cholesterol crystals. Nature, 2010. **464**(7293): p. 1357-61.
- 1126 114. Rajamaki, K., et al., Cholesterol crystals activate the NLRP3 inflammasome in human  
1127 macrophages: a novel link between cholesterol metabolism and inflammation. PLoS One, 2010.  
1128 **5**(7): p. e11765.
- 1129 115. Tao, X., et al., A tandem activation of NLRP3 inflammasome induced by copper oxide  
1130 nanoparticles and dissolved copper ion in J774A.1 macrophage. J Hazard Mater, 2021. **411**: p.  
1131 125134.

- 1132 116. Bauer, C., et al., *Colitis induced in mice with dextran sulfate sodium (DSS) is mediated by the*  
1133 *NLRP3 inflammasome*. Gut, 2010. **59**(9): p. 1192-9.
- 1134 117. Mukherjee, S.P., K. Kostarelos, and B. Fadeel, *Cytokine Profiling of Primary Human*  
1135 *Macrophages Exposed to Endotoxin-Free Graphene Oxide: Size-Independent NLRP3*  
1136 *Inflammasome Activation*. Adv Healthc Mater, 2018. **7**(4).
- 1137 118. Yamasaki, K., et al., *NLRP3/cryopyrin is necessary for interleukin-1beta (IL-1beta) release in*  
1138 *response to hyaluronan, an endogenous trigger of inflammation in response to injury*. J Biol  
1139 Chem, 2009. **284**(19): p. 12762-71.
- 1140 119. Liu, W., et al., *OxLDL-induced IL-1 beta secretion promoting foam cells formation was mainly*  
1141 *via CD36 mediated ROS production leading to NLRP3 inflammasome activation*. Inflamm Res,  
1142 2014. **63**(1): p. 33-43.
- 1143 120. Compan, V., et al., *Cell volume regulation modulates NLRP3 inflammasome activation*.  
1144 Immunity, 2012. **37**(3): p. 487-500.
- 1145 121. Brinkschulte, R., et al., *ATP-binding and hydrolysis of human NLRP3*. Commun Biol, 2022. **5**(1):  
1146 p. 1176.
- 1147 122. Samson, J.M., et al., *Computational Modeling of NLRP3 Identifies Enhanced ATP Binding and*  
1148 *Multimerization in Cryopyrin-Associated Periodic Syndromes*. Front Immunol, 2020. **11**: p.  
1149 584364.
- 1150 123. Kim, S., K. Lee, and K. Rhee, *NEK7 is a centrosomal kinase critical for microtubule nucleation*.  
1151 Biochem Biophys Res Commun, 2007. **360**(1): p. 56-62.
- 1152 124. Lai, H.J., et al., *Microtubule-Mediated NLRP3 Inflammasome Activation Is Independent of*  
1153 *Microtubule-Associated Innate Immune Factor GEF-H1 in Murine Macrophages*. Int J Mol Sci,  
1154 2020. **21**(4).
- 1155 125. Gonzalvez, F., et al., *Cardiolipin provides an essential activating platform for caspase-8 on*  
1156 *mitochondria*. J Cell Biol, 2008. **183**(4): p. 681-96.
- 1157 126. Guo, H., J.B. Callaway, and J.P. Ting, *Inflammasomes: mechanism of action, role in disease, and*  
1158 *therapeutics*. Nat Med, 2015. **21**(7): p. 677-87.
- 1159 127. Misawa, T., et al., *Microtubule-driven spatial arrangement of mitochondria promotes*  
1160 *activation of the NLRP3 inflammasome*. Nat Immunol, 2013. **14**(5): p. 454-60.
- 1161 128. Mileykovskaya, E. and W. Dowhan, *Cardiolipin membrane domains in prokaryotes and*  
1162 *eukaryotes*. Biochim Biophys Acta, 2009. **1788**(10): p. 2084-91.
- 1163 129. Tsujimoto, Y., T. Nakagawa, and S. Shimizu, *Mitochondrial membrane permeability transition*  
1164 *and cell death*. Biochim Biophys Acta, 2006. **1757**(9-10): p. 1297-300.
- 1165 130. Halestrap, A.P., G.P. McStay, and S.J. Clarke, *The permeability transition pore complex: another*  
1166 *view*. Biochimie, 2002. **84**(2-3): p. 153-66.
- 1167 131. Pizzuto, M. and P. Pelegrin, *Cardiolipin in Immune Signaling and Cell Death*. Trends Cell Biol,  
1168 2020. **30**(11): p. 892-903.
- 1169 132. Chu, C.T., et al., *Cardiolipin externalization to the outer mitochondrial membrane acts as an*  
1170 *elimination signal for mitophagy in neuronal cells*. Nat Cell Biol, 2013. **15**(10): p. 1197-1205.
- 1171 133. Hammond, G.R., M.P. Machner, and T. Balla, *A novel probe for phosphatidylinositol 4-*  
1172 *phosphate reveals multiple pools beyond the Golgi*. J Cell Biol, 2014. **205**(1): p. 113-26.
- 1173 134. Zhang, H., et al., *PtdIns4P restriction by hydrolase SAC1 decides specific fusion of*  
1174 *autophagosomes with lysosomes*. Autophagy, 2021. **17**(8): p. 1907-1917.
- 1175 135. Levin, R., et al., *Multiphasic dynamics of phosphatidylinositol 4-phosphate during*  
1176 *phagocytosis*. Mol Biol Cell, 2017. **28**(1): p. 128-140.
- 1177 136. Seoane, P.I., et al., *The NLRP3-inflammasome as a sensor of organelle dysfunction*. J Cell Biol,  
1178 2020. **219**(12).
- 1179 137. Lee, B., et al., *Disruptions in endocytic traffic contribute to the activation of the NLRP3*  
1180 *inflammasome*. Sci Signal, 2023. **16**(773): p. eabm7134.
- 1181 138. Chapman, R.E. and S. Munro, *Retrieval of TGN proteins from the cell surface requires*  
1182 *endosomal acidification*. EMBO J, 1994. **13**(10): p. 2305-12.

- 1183 139. Yoshimoto, K., *Beginning to understand autophagy, an intracellular self-degradation system in*  
1184 *plants*. Plant Cell Physiol, 2012. **53**(8): p. 1355-65.
- 1185 140. Gomez, R.E., et al., *Phosphatidylinositol-4-phosphate controls autophagosome formation in*  
1186 *Arabidopsis thaliana*. Nat Commun, 2022. **13**(1): p. 4385.
- 1187 141. Li, X., et al., *MARK4 regulates NLRP3 positioning and inflammasome activation through a*  
1188 *microtubule-dependent mechanism*. Nat Commun, 2017. **8**: p. 15986.
- 1189 142. Tancini, B., et al., *Lysosomal Exocytosis: The Extracellular Role of an Intracellular Organelle*.  
1190 Membranes (Basel), 2020. **10**(12).
- 1191 143. Nomura, J., et al., *Intracellular ATP Decrease Mediates NLRP3 Inflammasome Activation upon*  
1192 *Nigericin and Crystal Stimulation*. J Immunol, 2015. **195**(12): p. 5718-24.
- 1193 144. Yagi, M., et al., *Mitochondrial translation deficiency impairs NAD(+) -mediated lysosomal*  
1194 *acidification*. EMBO J, 2021. **40**(8): p. e105268.
- 1195 145. Sanman, L.E., et al., *Disruption of glycolytic flux is a signal for inflammasome signaling and*  
1196 *pyroptotic cell death*. Elife, 2016. **5**: p. e13663.
- 1197 146. Yu, S., et al., *Bafilomycin A1 enhances NLRP3 inflammasome activation in human monocytes*  
1198 *independent of lysosomal acidification*. FEBS J, 2021. **288**(10): p. 3186-3196.
- 1199 147. Waldegger, S., et al., *Mechanisms and clinical significance of cell volume regulation*. Nephrol  
1200 Dial Transplant, 1998. **13**(4): p. 867-74.
- 1201 148. Hoffmann, E.K., I.H. Lambert, and S.F. Pedersen, *Physiology of cell volume regulation in*  
1202 *vertebrates*. Physiol Rev, 2009. **89**(1): p. 193-277.
- 1203 149. Armstrong, C.M., *The Na/K pump, Cl ion, and osmotic stabilization of cells*. Proc Natl Acad Sci  
1204 U S A, 2003. **100**(10): p. 6257-62.
- 1205 150. Li, P., et al., *LRR8 family proteins within lysosomes regulate cellular osmoregulation and*  
1206 *enhance cell survival to multiple physiological stresses*. Proc Natl Acad Sci U S A, 2020. **117**(46):  
1207 p. 29155-29165.
- 1208 151. Saric, A. and S.A. Freeman, *Endomembrane Tension and Trafficking*. Front Cell Dev Biol, 2020.  
1209 **8**: p. 611326.
- 1210 152. Soltoff, S.P. and L.J. Mandel, *Active ion transport in the renal proximal tubule. III. The ATP*  
1211 *dependence of the Na pump*. J Gen Physiol, 1984. **84**(4): p. 643-62.
- 1212 153. Wang, X.Q., et al., *Apoptotic insults impair Na<sup>+</sup>, K<sup>+</sup>-ATPase activity as a mechanism of neuronal*  
1213 *death mediated by concurrent ATP deficiency and oxidant stress*. J Cell Sci, 2003. **116**(Pt 10): p.  
1214 2099-110.
- 1215 154. Kobayashi, M., et al., *The cardiac glycoside ouabain activates NLRP3 inflammasomes and*  
1216 *promotes cardiac inflammation and dysfunction*. PLoS One, 2017. **12**(5): p. e0176676.
- 1217 155. Green, J.P., et al., *LRR8A is essential for hypotonicity-, but not for DAMP-induced NLRP3*  
1218 *inflammasome activation*. Elife, 2020. **9**.
- 1219 156. Lima, H., Jr., et al., *Role of lysosome rupture in controlling Nlrp3 signaling and necrotic cell*  
1220 *death*. Cell Cycle, 2013. **12**(12): p. 1868-78.
- 1221 157. Tan, J.X. and T. Finkel, *A phosphoinositide signalling pathway mediates rapid lysosomal repair*.  
1222 Nature, 2022. **609**(7928): p. 815-821.
- 1223 158. He, Y., H. Hara, and G. Nunez, *Mechanism and Regulation of NLRP3 Inflammasome Activation*.  
1224 Trends Biochem Sci, 2016. **41**(12): p. 1012-1021.
- 1225 159. Dinarello, C.A., *Immunological and inflammatory functions of the interleukin-1 family*. Annu  
1226 Rev Immunol, 2009. **27**: p. 519-50.
- 1227 160. Heilig, R., et al., *The Gasdermin-D pore acts as a conduit for IL-1beta secretion in mice*. Eur J  
1228 Immunol, 2018. **48**(4): p. 584-592.
- 1229 161. Vigano, E., et al., *Human caspase-4 and caspase-5 regulate the one-step non-canonical*  
1230 *inflammasome activation in monocytes*. Nat Commun, 2015. **6**: p. 8761.
- 1231 162. Manukyan, G. and R. Aminov, *Update on Pyrin Functions and Mechanisms of Familial*  
1232 *Mediterranean Fever*. Front Microbiol, 2016. **7**: p. 456.
- 1233 163. Mishra, B.B., et al., *Nitric oxide controls the immunopathology of tuberculosis by inhibiting*  
1234 *NLRP3 inflammasome-dependent processing of IL-1beta*. Nat Immunol, 2013. **14**(1): p. 52-60.



- 1235 164. Biasizzo, M. and N. Kopitar-Jerala, *Interplay Between NLRP3 Inflammasome and Autophagy*.  
1236 Front Immunol, 2020. **11**: p. 591803.
- 1237 165. Liu, K., et al., *SAC1 regulates autophagosomal phosphatidylinositol-4-phosphate for*  
1238 *xenophagy-directed bacterial clearance*. Cell Rep, 2021. **36**(4): p. 109434.
- 1239 166. Weber, M.M. and R. Faris, *Subversion of the Endocytic and Secretory Pathways by Bacterial*  
1240 *Effector Proteins*. Front Cell Dev Biol, 2018. **6**: p. 1.
- 1241 167. Pizarro-Cerda, J., et al., *Virulent Brucella abortus prevents lysosome fusion and is distributed*  
1242 *within autophagosome-like compartments*. Infect Immun, 1998. **66**(5): p. 2387-92.
- 1243 168. Cypryk, W., T.A. Nyman, and S. Matikainen, *From Inflammasome to Exosome-Does*  
1244 *Extracellular Vesicle Secretion Constitute an Inflammasome-Dependent Immune Response?*  
1245 Front Immunol, 2018. **9**: p. 2188.
- 1246
